1 **Genomic prediction with whole-genome**  
2 **sequence data in intensely selected pig lines**

3

4 Roger Ros-Freixedes<sup>1,2§</sup>, Martin Johnsson<sup>1,3</sup>, Andrew Whalen<sup>1</sup>, Ching-Yi Chen<sup>4</sup>,  
5 Bruno D Valente<sup>4</sup>, William O Herring<sup>4</sup>, Gregor Gorjanc<sup>1</sup>, John M Hickey<sup>1</sup>

6

7 <sup>1</sup> The Roslin Institute and Royal (Dick) School of Veterinary Studies, The University  
8 of Edinburgh, Easter Bush, Midlothian, Scotland, UK

9 <sup>2</sup> Departament de Ciència Animal, Universitat de Lleida - Agrotecnio-CERCA Center,  
10 Lleida, Spain.

11 <sup>3</sup> Department of Animal Breeding and Genetics, Swedish University of Agricultural  
12 Sciences, Uppsala, Sweden.

13 <sup>4</sup> The Pig Improvement Company, Genus plc, Hendersonville, TN, USA.

14 <sup>§</sup>Corresponding author: RRF [roger.ros@roslin.ed.ac.uk](mailto:roger.ros@roslin.ed.ac.uk)

15

## **Abstract**

### **Background**

16 Early simulations indicated that whole-genome sequence data (WGS) could improve  
17 prediction accuracy and its persistence across generations and breeds. However,  
18 results in real datasets have been ambiguous so far. Large data sets that capture most  
19 of the genome diversity in a population must be assembled so that allele substitution  
20 effects are estimated with higher accuracy. The objectives of this study were to use a  
21 large pig dataset to assess the benefits of using WGS for genomic prediction  
22 compared to using commercial marker arrays, to identify scenarios in which WGS  
23 provides the largest advantage, and to identify potential pitfalls for its effective  
24 implementation.

### **Methods**

25 We sequenced 6,931 individuals from seven commercial pig lines with different  
26 numerical size. Genotypes of 32.8 million variants were imputed for 396,100  
27 individuals (17,224 to 104,661 per line). We used BayesR to perform genomic  
28 prediction for 8 real traits and 9 simulated traits with different genetic architectures.  
29 Genomic predictions were performed using either data from a marker array or variants  
30 preselected from WGS based on linkage disequilibrium, functional annotation, or  
31 association tests. Both single and multi-line training sets were explored.

### **Results**

32 Using WGS improved prediction accuracy relative to the marker array, provided that  
33 training sets were sufficiently large, especially for traits with high heritability and low  
34 number of quantitative trait nucleotides. The performance of each set of predictor  
35 variants was not robust across traits and lines. The most robust results were obtained

36 when preselected variants with statistically significant associations were added to the  
37 marker array. Under this method, average improvements of prediction accuracy of 2.5  
38 and 4.2 percentage points were observed in within-line and multi-line scenarios,  
39 respectively, with training sets of around 80k individuals.

### **Conclusions**

40 Our results evidenced the potential for WGS to improve genomic prediction accuracy  
41 in intensely selected pig lines. Although the prediction accuracy improvements  
42 achieved so far were modest at best, we would expect that more robust improvements  
43 could be attained with a combination of larger training sets and optimised pipelines.

44

## Introduction

45           Whole-genome sequence data (WGS) has the potential to empower the  
46 identification of causal variants that underlie quantitative traits or diseases [1–4],  
47 increase the precision and scope of population genetic studies [5,6], and enhance  
48 livestock breeding. Genomic prediction has been successfully implemented in the  
49 main livestock species and it has increased the rate of genetic gain [7]. Genomic  
50 prediction has provided many benefits such as greater accuracies of genetic  
51 evaluations and the reduction of the generational interval in dairy cattle. However,  
52 since its early implementations, genomic prediction is typically performed using  
53 marker arrays that capture the effects of the (usually unknown) causal variants via  
54 linkage disequilibrium. Alternatively, WGS are assumed to contain the causal variants  
55 themselves. For this reason, it was hypothesized that such data could further improve  
56 prediction accuracy and its persistence across generations and breeds. Early  
57 simulations indicated that causal mutations from WGS could increase prediction  
58 accuracy [8–13]. One simulation study indicated that the magnitude of prediction  
59 accuracy improvement relative to dense marker arrays ranged from 2.5 to 3.7%, with  
60 a persistence of over 10 generations [11]. Another one reached improvements of 30%  
61 if causal variants with low minor allele frequency could be captured by the WGS [9].  
62 However, benefits could be on the lower end of that range in standard livestock  
63 populations due to small effective population sizes and long-term negative selection  
64 [10].

65           During the last few years, there have been several attempts at improving the  
66 accuracy of genomic prediction with the use of WGS in the main livestock species.  
67 Results have been ambiguous so far. When predicting genomic breeding values within  
68 breed or line, some studies found no relevant improvement of prediction accuracy for

69 WGS compared to marker arrays [14–18]. Other studies found small, and often  
70 unstable, improvements (e.g., from 1 to 5% or no improvement depending on  
71 prediction method [19–21], or trait-dependent results [21,22]). When predicting  
72 genomic breeding values across populations, the identification of causal variants from  
73 WGS can improve prediction accuracy [23–26], especially for small populations  
74 where initial prediction accuracy was low or that were not included in the training  
75 population [23,25–28].

76 One of the most successful strategies to exploit WGS consists in augmenting  
77 available marker arrays with preselected variants from WGS based on their  
78 association with the trait of interest [29–32]. In some cases, this strategy improved  
79 prediction accuracy by up to 9% [31] and 11% [32]. However, it did not improve  
80 prediction accuracies in other within-line scenarios [16]. Nevertheless, this shows  
81 how identifying causal variants could enhance genomic prediction with WGS. Whole-  
82 genome sequence data has already been applied in genome-wide association studies  
83 (GWAS) to identify variants associated to a variety of traits in livestock [2,33–35],  
84 including pigs [36,37]. However, the fine-mapping of causal variants remains  
85 challenging due to the pervasive long-range linkage disequilibrium across extremely  
86 dense variation.

87 High accuracy in estimating allele substitution effects and, ideally, the  
88 identification of causal variants amongst millions of other variants are important for  
89 the usefulness of WGS in research and breeding. This requires large data sets able to  
90 capture most of the genome diversity in a population. Despite that low-cost  
91 sequencing strategies have been developed, which typically involve sequencing a  
92 subset of the individuals in a population at low coverage and then imputing WGS for  
93 the remaining individuals [38–40], the cost of generating accurate WGS at this scale,

94 as well as the large computational requirements for the analyses of such datasets, have  
95 limited the population sizes or number of populations tested in some of the previous  
96 studies. This hinders the interpretation of results across studies, which are very  
97 diverse in population structures, sequencing strategies and prediction methodologies  
98 used. The largest studies on the use of WGS for genomic prediction to date have been  
99 performed in cattle, for which large multi-breed reference panels are available from  
100 the 1000 Bull Genomes Project [2,19,33]. This has enabled the imputation of WGS  
101 for cattle populations. The lack of such available reference panels has been cited as an  
102 important limiting factor for performing similar studies in other species, such as pigs  
103 [36].

104 We have previously described our approach to impute WGS in large pedigreed  
105 populations without the need for haplotype phased reference panels [41]. Following  
106 that strategy, we generated WGS for 396,100 pigs from seven intensely selected lines  
107 with diverse genetic backgrounds and numerical size. The objectives of this study  
108 were to use this large pig dataset to assess the benefits of using WGS for genomic  
109 prediction compared to using commercial marker arrays, to identify scenarios in  
110 which WGS provides the largest advantage, and to identify potential pitfalls for its  
111 effective implementation.

112

## **Materials and Methods**

### **Populations and sequencing strategy**

113 We performed whole-genome re-sequencing of 6,931 individuals from seven  
114 commercial pig lines (Genus PIC, Hendersonville, TN) with a total coverage of  
115 approximately 27,243x. Sequencing effort in each of the seven lines was proportional  
116 to population size. Approximately 1.5% (0.9 to 2.1% in each line) of the pigs in each

117 line were sequenced. Most pigs were sequenced at low coverage, with target coverage  
118 of 1 or 2x, but a subset of pigs were sequenced at higher coverage of 5, 15, or 30x.  
119 Thus, the average individual coverage was 3.9x, but the median coverage was 1.5x.  
120 The number of pigs sequenced and at which coverage for each line is summarized in  
121 Table 1.

122 The sequenced pigs and their coverage were selected following a three-part  
123 sequencing strategy developed to represent the haplotype diversity in each line. First  
124 (1), sires and dams with the highest number of genotyped progeny were sequenced at  
125 2x and 1x, respectively. Sires were sequenced at a greater coverage because they  
126 contributed with more progeny than dams. Then (2), the individuals with the greatest  
127 genetic footprint on the population (i.e., those that carry more of the most common  
128 haplotypes) and their immediate ancestors were sequenced at a coverage between 1x  
129 and 30x (AlphaSeqOpt part 1; [42]). The sequencing coverage was allocated with an  
130 algorithm that maximises the expected phasing accuracy of the common haplotypes  
131 from the cumulated family information. Finally (3), pigs that carried haplotypes with  
132 low cumulated coverage (below 10x) were sequenced at 1x (AlphaSeqOpt part 2;  
133 [43]). Sets (2) and (3) were based on haplotypes inferred from marker array genotypes  
134 (GGP-Porcine HD BeadChip; GeneSeek, Lincoln, NE), which were phased and  
135 imputed using AlphaPhase [44] and AlphaImpute [45].

136 Most sequenced pigs and their relatives were also genotyped either at low  
137 density (15k markers) using the GGP-Porcine LD BeadChip (GeneSeek) or at high  
138 density (80k markers) using the GGP-Porcine HD BeadChip (GeneSeek). Quality  
139 control of the marker array data was based on the individuals genotyped at high  
140 density. Markers with minor allele frequency below 0.01, call rate below 0.80, or that

141 failed the Hardy-Weinberg equilibrium test were removed. After quality control,  
142 38,634 to 43,966 markers remained in each line.

143

### Sequencing and data processing

144 Tissue samples were collected from ear punches or tail clippings. Genomic  
145 DNA was extracted using Qiagen DNeasy 96 Blood & Tissue kits (Qiagen Ltd.,  
146 Mississauga, ON, Canada). Paired-end library preparation was conducted using the  
147 TruSeq DNA PCR-free protocol (Illumina, San Diego, CA). Libraries for  
148 resequencing at low coverage (1 to 5x) were produced with an average insert size of  
149 350 bp and sequenced on a HiSeq 4000 instrument (Illumina). Libraries for  
150 resequencing at high coverage (15 or 30x) were produced with an average insert size  
151 of 550 bp and sequenced on a HiSeq X instrument (Illumina). All libraries were  
152 sequenced at Edinburgh Genomics (Edinburgh Genomics, University of Edinburgh,  
153 Edinburgh, UK).

154 DNA sequence reads were pre-processed using Trimmomatic [46] to remove  
155 adapter sequences from the reads. The reads were then aligned to the reference  
156 genome *Sscrofa11.1* (GenBank accession: GCA\_000003025.6) using the BWA-MEM  
157 algorithm [47]. Duplicates were marked with Picard  
158 (<http://broadinstitute.github.io/picard>). Single nucleotide polymorphisms (SNPs) and  
159 short insertions and deletions (indels) were identified with the variant caller GATK  
160 HaplotypeCaller (GATK 3.8.0) [48,49] using default settings. Variant discovery with  
161 GATK HaplotypeCaller was performed separately for each individual and then a joint  
162 variant set for all the individuals in each population was obtained by extracting the  
163 variant positions from all the individuals.



164 We extracted the read counts supporting each allele directly from the aligned  
165 reads stored in the BAM files using a pile-up function to avoid biases towards the  
166 reference allele introduced by GATK when applied on low-coverage WGS [50]. That  
167 pipeline uses the tool pysam (version 0.13.0; [https://github.com/pysam-](https://github.com/pysam-developers/pysam)  
168 [developers/pysam](https://github.com/pysam-developers/pysam)), which is a wrapper around htslib and the samtools package [51].  
169 We extracted the read counts for all biallelic variant positions, after filtering variants  
170 in potential repetitive regions (defined as variants that had mean depth values 3 times  
171 greater than the average realized coverage) with VCFtools [52]. This amounted to a  
172 total of 55.6 million SNP (19.6 to 31.1 million within each line) and 10.2 million  
173 indels (4.1 to 5.6 million within each line). A more complete description of the  
174 variation across the lines is provided in [53].

175

### **Genotype imputation**

176 Genotypes were jointly called, phased and imputed for a total of 483,353  
177 pedigree-related individuals using the ‘hybrid peeling’ method implemented in  
178 AlphaPeel [54,55]. This method used all the available marker array and WGS.  
179 Imputation was performed separately for each line using complete multi-generational  
180 pedigrees, which encompassed from 21,129 to 122,753 individuals each (Table 1).  
181 We have previously published reports on the accuracy of imputation in the same  
182 populations using this method [41]. The estimated average individual-wise dosage  
183 correlation was 0.94 (median: 0.97). Individuals with low predicted imputation  
184 accuracy were removed before further analyses. An individual was predicted to have  
185 low imputation accuracy if itself or all of its grandparents were not genotyped with a  
186 marker array or if it had a low degree of connectedness to the rest of the population.  
187 These criteria were based on the analysis of simulated and real data on imputation

188 accuracy [41]. A total of 396,100 individuals remained, with each line comprising  
189 between 17,224 and 104,661 individuals (Table 1). The expected average individual-  
190 wise dosage correlation of the remaining individuals was 0.97 (median: 0.98)  
191 according to our previous estimates. We also excluded from the analyses variants with  
192 a minor allele frequency lower than 0.023, as their estimated variant-wise dosage  
193 correlations was lower than 0.90 [41]. After imputation, 32.8 million variants (14.5 to  
194 19.9 million within each line) remained for downstream analyses, out of which 9.9  
195 million segregated across all seven lines.

196

### **Traits**

197 We analysed data of 8 traits that are commonly included in selection  
198 objectives of pig breeding programmes: average daily gain (ADG, g), backfat  
199 thickness (BFT, mm), loin depth (LD, mm), average daily feed intake (ADFI, kg),  
200 feed conversion ratio (FCR), total number of piglets born (TNB), litter weight at  
201 weaning (LWW, kg), and return to oestrus 7 days after weaning (RET, binary trait).  
202 Most pigs with records were born during the 2008–2020 period. Breeding values were  
203 estimated by line with a linear mixed model that included polygenic and non-genetic  
204 (as relevant for each trait) effects. Deregressed breeding values (dEBV) were obtained  
205 following the method by VanRaden and Wiggans [56]. Only individuals in which the  
206 trait was directly measured were retained for further analyses. The number of records  
207 for each trait used in the analyses of each line is detailed in Table 2.

208

### ***Simulated traits***

210 To assist in the interpretation of results, we also created 9 simulated traits with  
211 different numbers of quantitative trait nucleotides (QTN; 100, 1,000 or 10,000 QTN)

212 and heritability levels ( $h^2$ ; 0.10, 0.25 or 0.50). Positions of the QTN were sampled  
213 randomly amongst all variants called across all lines. Because QTN were sampled  
214 from all variants, some QTN were fixed in some of the lines while segregating in  
215 others. There were only negligible differences in the number of segregating QTN per  
216 line (53 to 61, 531 to 583, or 5375 to 6058, respectively). Marker effects of the QTN  
217 were sampled from a gamma distribution with shape=2 and scale=5. After a polygenic  
218 term was calculated for each individual using these marker effects, residual terms  
219 were sampled from a normal distribution with a variance parameter adjusted to  
220 produce the desired heritability level. The number of records for the simulated traits is  
221 detailed in Table 2. In these simulations, we used the imputed genotypes as real  
222 genotypes and, therefore, implicitly cancelled any errors that might arise from the  
223 processing of the sequencing reads and genotype imputation.

224

### **Training and testing sets**

225 We split the individuals in each population into training and testing sets. The  
226 testing sets were defined as those individuals from full-sib families from the last  
227 generation of the pedigree (i.e., individuals that did not have any progeny of their  
228 own). Only families with a minimum of 5 full-sibs were considered. The training set  
229 was defined as all those individuals that had a pedigree coefficient of relationship  
230 lower than 0.5 with any individual of the testing set. This design was chosen to mimic  
231 a realistic situation in which breeding companies evaluate the selection candidates  
232 available in the selection nucleus at any given time.

233

## Genome-wide association study

234 To assess whether variants from the WGS could provide a finer mapping of  
235 causal variants than marker array data, and to provide an association-based criterion  
236 to preselect variants for the genomic prediction tests, we performed a GWAS for each  
237 trait and line. This step included only the individuals in the training set. We fitted a  
238 univariate linear mixed model that accounted for the genomic relationship matrix as:

$$239 \quad \mathbf{y} = \mathbf{x}_i \beta_i + \mathbf{u} + \mathbf{e},$$

240 where  $\mathbf{y}$  is the vector of dEBV,  $\mathbf{x}_i$  is the vector of genotypes for the  $i$ th SNP coded as  
241 0 and 2 if homozygous for either allele or 1 if heterozygous,  $\beta_i$  is the additive effect  
242 of the  $i$ th SNP on the trait,  $\mathbf{u} \sim N(0, \sigma_u^2 \mathbf{K})$  is the vector of polygenic effects with the  
243 covariance matrix equal to the product of the polygenic additive variance  $\sigma_u^2$  and a  
244 genomic relationship matrix  $\mathbf{K}$ , and  $\mathbf{e}$  is a vector of uncorrelated residuals. Due to  
245 computational limitations, the genomic relationship matrix  $\mathbf{K}$  was calculated using  
246 only imputed SNP genotypes in the marker array regardless of whether the association  
247 study involves the SNPs in the marker array or the variants in WGS. We used the  
248 FastLMM software [57,58] to fit the model.

249 We used the same p-value threshold ( $p < 10^{-6}$ ) for both marker array and for  
250 sequence associations, because while the WGS contains many more variants, they are  
251 also expected to be in higher linkage disequilibrium. This threshold was based on  
252 Bonferroni's multiple test correction assuming that the markers from the marker array  
253 were independent. For the simulated traits, we defined genomic regions that contained  
254 significant associations and assessed whether or not they contained a QTN. These  
255 regions were defined by overlapping 500-kb segments centered on the significant  
256 markers.

257

## Genomic prediction in within-line scenarios

258 To test whether variants from the WGS could provide greater prediction  
259 accuracy than the marker array, we tested genomic prediction using variants from the  
260 marker array, from the WGS, or combining them. The marker array data (referred to  
261 as ‘Chip’) was set as the benchmark for prediction accuracy. It contained all ~40k  
262 variants in the marker array. For the sequence-based predictors, we preselected sets of  
263 variants because currently available methods for genomic prediction are not yet  
264 capable of handling datasets as large as the complete WGS. We tested different  
265 alternative strategies for preselecting the predictor variants:

- 266 • *LDTags*. Tag variants retained after pruning based on linkage disequilibrium.  
267 Variants were removed so that no pairs of SNPs with  $r^2 > 0.1$  remained in any 10-  
268 Mb window (windows slid by 2,000 variants) using Plink 1.9 [59]. The number  
269 of predictor variants preselected by this method was on average of 30k variants  
270 (range: 5k to 80k).
- 271 • *Top40k*. Variants preselected based on GWAS analyses. To mimic the number of  
272 variants in Chip, we preselected the variants with the lowest p-value (not  
273 necessarily below the significance threshold) in each of consecutive non-  
274 overlapping 55-kb windows along the genome. In addition, to test the impact of  
275 variant density on prediction accuracy, we preselected 10k, 25k, 75k, or 100k  
276 predictor variants following the same criterion.
- 277 • *ChipPlusSign*. Variants preselected based on GWAS analyses as in Top40k, but  
278 only significant variants ( $p \leq 10^{-6}$ ) were preselected and merged with those in  
279 Chip. When a 55-kb window contained more than one significant variant, only  
280 that with the lowest p-value was selected as a proxy, in order to reduce the

281 preselection of multiple significant SNPs tagging the same causal variant. On  
282 average, 309 significant variants were identified per trait and line (range: 23 to  
283 1083; Table 3). These significant variants were merged with those in Chip.

284 • *Functional*. Variants that were annotated as loss-of-function or missense  
285 according to Ensembl Variant Effect Predictor (Ensembl VEP; version 97, July  
286 2019) [60]. The most severe predicted consequence type for each variant was  
287 retrieved. The number of predictor variants preselected by this method was on  
288 average of 35k variants (range: 27k to 40k).

289 • *Rand40k*. The same number of predictor variants as in Chip, chosen randomly.

290 Genomic prediction was performed by fitting a univariate model with BayesR  
291 [61,62], with a mixture of normal distributions as the prior for variant effects,  
292 including one distribution that sets the variant effects to zero. The model was:

$$\mathbf{y} = \mathbf{1}\mu + \mathbf{X}\boldsymbol{\beta} + \mathbf{e},$$

293 where  $\mathbf{y}$  is the vector of dEBV,  $\mathbf{1}$  is a vector of ones,  $\mu$  is the general mean,  $\mathbf{X}$  is a  
294 matrix of genotypes,  $\boldsymbol{\beta}$  is a vector of variant effects, and  $\mathbf{e}$  is a vector of uncorrelated  
295 residuals. The prior variance of the variant effects in  $\boldsymbol{\beta}$  had four components with  
296 variances  $\sigma_1^2 = 0$ ,  $\sigma_2^2 = 0.0001\sigma_g^2$ ,  $\sigma_3^2 = 0.001\sigma_g^2$ , or  $\sigma_4^2 = 0.01\sigma_g^2$ , where  $\sigma_g^2$  is the  
297 total genetic variance. We used a uniform and almost uninformative prior for the  
298 mixture distribution. We used a publicly available implementation of BayesR  
299 (<https://github.com/syntheke/bayesR>; accessed on 30 April 2021), with default  
300 settings. Prediction accuracy was calculated in the testing set as the correlation  
301 between the genomic estimated breeding value and the dEBV. Bias of the prediction  
302 accuracy was calculated as the regression coefficient of the dEBV on the genomic  
303 estimated breeding values.

304 It has been noted that using the same reference individuals for preselecting  
305 variants through GWAS and for training the predictive equation can reduce prediction  
306 accuracy and bias the predicted breeding values [16,63]. To account for that, we  
307 reanalysed some of the scenarios after splitting the training set into two exclusive  
308 subsets, one for GWAS to preselect the predictor variants and one for training the  
309 predictive equation. The GWAS subset was defined by randomly selecting either 10%  
310 or 50% of the individuals in the original training set. Those individuals were excluded  
311 from the subset used for training the predictive equation afterwards.

312

### **Genomic prediction in multi-line scenarios**

313 We considered multi-line scenarios in which the training set consisted of  
314 merging the training sets that had been defined for each line. All analyses were  
315 performed as for the within-line scenarios but with a line effect. In the multi-line  
316 scenarios, all SNPs from the marker array that passed quality control and were  
317 imputed for at least one line were included in the baseline (referred to as ‘ML-Chip’).  
318 For ease of computation, the strategies for preselection of predictor variants from  
319 WGS were applied only to the subset of 9.9 million variants that had been called and  
320 imputed in all seven lines. Thus, we defined the predictor sets ‘ML-Top40k’ and  
321 ‘ML-ChipPlusSign’ by preselecting variants following the same criteria as in within-  
322 line scenarios, but using a multi-line GWAS analyses with line effect instead. For  
323 ML-ChipPlusSign, 60 to 7247 significant variants were identified per trait (Table 3)  
324 and merged with those in ML-Chip. For comparison purposes, prediction accuracy  
325 was calculated for the testing set of each individual line.

326

## Results

### Prediction accuracy within line

327 Whole-genome sequence data can improve prediction accuracy of marker  
328 array data when there is a sufficiently large training set and if an appropriate set of  
329 predictor variants is preselected. Figure 1 shows the prediction accuracy for the case  
330 with the largest training set using different sets of predictor variants. In this case, all  
331 tested sets of variants from the WGS, except for LDTags, yielded increases of  
332 prediction accuracy that ranged from +2.0% to +9.2%. Using WGS also reduced bias  
333 relative to Chip in some scenarios. However, the performance across predictor  
334 variants set was not robust for the most part, and differed for each trait and line  
335 (Additional File 1), often leading to no improvements of prediction accuracy or even  
336 reduced prediction accuracy relative to Chip. One stable feature of the results was  
337 LDTags showing a noticeable decrease in prediction accuracy in most traits and lines.

338 The size of the training set was one of the main factors that determined the  
339 capacity of predictor variants from the WGS to improve the baseline prediction  
340 accuracy of Chip. Figures 2 and 3 show the difference in prediction accuracy of  
341 Top40k and ChipPlusSign with respect to the baseline of Chip against the number of  
342 phenotypic records available in the training set. We observed large variability for the  
343 difference in prediction accuracy, especially when the training set was small. This  
344 variability was larger in Top40k than in ChipPlusSign, in a way that shrinkage of  
345 variation as the training set was larger was more noticeable in ChipPlusSign. Gains in  
346 prediction accuracy were low-to-moderate in the most favourable cases. In the most  
347 unfavourable ones we observed large losses in prediction accuracy for Top40k but  
348 more restrained losses for ChipPlusSign with moderate training set sizes. For both  
349 sets of predictor variants, there was a positive trend that supported the need for large



350 training sets. This trend was clearer in ChipPlusSign than in Top40k, because of the  
351 apparent lower robustness of the latter. Results for the other sets of predictor variants  
352 are provided in Additional File 2.

353         The genetic architecture of the traits was also related to the success of WGS  
354 for improving prediction accuracy. As the true genetic architecture of real complex  
355 traits is mostly unknown, we used simulated traits to show that traits with high  
356 heritability and low number of QTN were more likely to show larger improvements in  
357 predictive performances. With Top40k (Figure 4), heritability seemed to be the main  
358 factor that affected the expected improvement with large training sets (from null  
359 improvements when  $h^2=0.1$  to improvements of approximately 0.05 when  $h^2=0.5$ ,  
360 regardless of number of QTN, with a training set of 92k individuals). With  
361 ChipPlusSign (Figure 5), the expected improvements with the same training set (92k  
362 individuals) were not only greater in magnitude but depended on both heritability and  
363 number of QTN (from null improvements when  $h^2=0.1$  to improvements of  
364 approximately 0.03 to 0.10 when  $h^2=0.5$  with a number of 100 to 10k QTN,  
365 respectively). Results confirmed the trends observed for the real traits (Figures 4 and  
366 5); for instance, the higher robustness of ChipPlusSign compared to Top40k.

367         We observed diminishing returns when we increased the density of the  
368 predictor variants. Increasing the number of predictor variants from the 40k in  
369 Top40k to 75k selected in the same way yielded small improvements in prediction  
370 accuracy compared to Top40k, but increases up to 100k variants provided smaller or  
371 null additional gains (Additional File 3).

372         Splitting the original training set into two exclusive subsets, one for the  
373 GWAS-based preselection of the variants and one for the training of the predictive  
374 equation did not improve the prediction accuracy (Additional File 4). For

375 ChipPlusSign, this strategy reduced the bias but prediction accuracy decreased too,  
376 probably because of the smaller subset available for training the predictive equation.

377

### **Prediction accuracy in multi-line scenarios**

378 The performance of genomic predictors trained with multi-line datasets was  
379 systematically lower than in the within-line scenarios (Additional File 5).  
380 Nonetheless, the ML-ChipPlusSign predictor variants in general increased prediction  
381 accuracy relative to ML-Chip (Figure 6). The increase in genomic prediction accuracy  
382 for each line was largely dependent on the number of individuals of each line in the  
383 training set. Therefore, the greatest improvements were achieved for the largest lines.  
384 However, in the multi-line scenarios we observed increases of prediction accuracy for  
385 some traits and lines for which no improvements were observed in the within-line  
386 scenarios (Figure 7). In contrast, results for ML-Top40k were not robust (Additional  
387 File 6).

388

### **Association tests**

389 First, we assessed the performance of GWAS using the simulated traits. Table  
390 4 shows the number of regions with significant associations that were detected using  
391 either Chip or WGS, and whether they contained zero, one or multiple true QTN. The  
392 WGS allowed the detection of a much larger proportion of true QTN than the Chip,  
393 especially for the traits with high heritability and with large population sizes. The  
394 most favourable scenarios for identifying regions that contained unequivocally a  
395 single QTN with WGS were those in which the trait was controlled by a low number  
396 of true QTN. However, even though the genetic architecture was very simple and  
397 consisted of additive effects alone, the regions with significant associations only

398 captured a small fraction of the QTN that segregated within each line. Moreover,  
399 using WGS also increased the number of regions with significant associations that  
400 contained no QTN, which could therefore be considered as false positives. Some of  
401 the selected regions contained multiple QTN, which could indicate either a ‘hit by  
402 chance’ or an inability to disentangle multiple causal variants. While false positives  
403 also occur with Chip, their incidence was more severe with the WGS, especially for  
404 traits with a large number of QTN. Large population sizes further aggravated the  
405 inflation of genome-wide p-values.

406         Despite this, with the real traits we found that GWAS using WGS can  
407 contribute to a better understanding of the genetic mechanisms that underlie the traits  
408 of interest. To illustrate this, we examined the GWAS results for BFT in line A, for  
409 which a large number of phenotypic records were available. Figure 8 shows the  
410 results for chromosome 1 as an example, while Additional File 7 shows the results for  
411 six genomic regions of interest. The main genomic regions and candidate genes  
412 associated to BFT detected with Chip in the same genetic lines studied here were  
413 reported elsewhere [64]. We will use the candidate genes reported there to refer to the  
414 genomic regions with significant associations. Using Chip, we identified 6 genomic  
415 regions ( $p < 10^{-6}$ ). Using WGS (with a more stringent significance threshold of  $p < 10^{-9}$   
416 to focus on the most significant associations), we confirmed 3 of these genomic  
417 regions that co-located to candidate genes *MC4R*, *DOLK*, and *DGKI* or *PTN*.  
418 However, the most associated variants in each of these genomic regions located  
419 outside the coding region of these putative causal genes. These signals sometimes had  
420 very strong evidence of association for some variants that were relatively distant from  
421 our candidate functional gene, which could cast doubts about the fine-mapping of the  
422 causal mutation. The region at SSC18, 9–13 Mb, contained two candidate genes

423 *DGKI* and *PTN*, but the WGS revealed significantly associated variants within *DGKI*  
424 and none within *PTN*, despite that the strongest associations were away from both  
425 genes at 10.5-11 Mb. Using the WGS we also detected 24 additional genomic regions  
426 that contained candidate genes such as *CYB5R4*, *IGF2*, and *LEPR*. These genes were  
427 previously detected in other lines using the Chip but not in this one [64], sometimes  
428 because there were no markers for the associated region in Chip (SSC2, 0–4 Mb). The  
429 region at SSC1, 52.5–53.5 Mb, showed many significant variants that encompassed  
430 not only the previously identified candidate gene *CYB5R4*, but also *MRAP2*  
431 (annotated with functions on feeding behavior and energy homeostasis). In contrast,  
432 candidate gene *LEPR* was located within the region at SSC6, 146.5–147.0 Mb, where  
433 many significant variants were located, although the most significant variants were  
434 not in the coding regions of the gene. Using the WGS we also identified additional  
435 candidate genes that had not been previously detected in any of the lines, such as  
436 *CYP24A1* (annotated with functions on fatty acid omega-oxidation and vitamin D  
437 metabolism; not shown). For many of the other genomic regions, it was difficult to  
438 pinpoint a candidate gene with the available information or there were no annotated  
439 genes.

440

## Discussion

441 Our results evidenced the potential for WGS to improve genomic prediction  
442 accuracy in intensely selected pig lines, provided that the training sets are large  
443 enough. Improvements achieved so far were modest at best. On one hand, these  
444 modest improvements indicated that the strategies that we tested were likely  
445 suboptimal. On the other hand, the positive trend for the largest training sets indicated  
446 that we might have not reached the critical mass of data that is needed to leverage the

447 potential of WGS, especially in scenarios where genomic prediction with marker  
448 arrays is already yielding high accuracy. The results from several traits and lines with  
449 different training set sizes and the use of simulated phenotypes allowed us to identify  
450 the most favourable scenarios for genomic prediction with WGS. We will discuss (1)  
451 the prediction accuracy that we achieved with WGS compared to commercial marker  
452 array data and the scenarios in which WGS may become beneficial, and (2) the  
453 potential pitfalls for its effective implementation and the need for an optimised  
454 strategy.

455

### **Prediction accuracy with whole-genome sequence data**

456 We compared the genomic prediction accuracy of the current marker array  
457 (Chip) with sets of preselected sequence variants in a way that the number of variants  
458 remained similar across sets. Improvements of prediction accuracy can be limited if  
459 current marker arrays are already sufficiently dense to capture a large proportion of  
460 the genetic variance in intensely selected livestock populations. These populations  
461 typically have small effective population size [10,19]. Nevertheless, modest  
462 improvements have been achieved under certain scenarios. In our study, the most  
463 robust results were obtained for the ChipPlusSign set, where variants that showed  
464 statistically significant associations to the trait were preselected and added to the  
465 information from the marker array. This is consistent with previous reports that  
466 showed an improvement of prediction accuracy under similar approaches [29–32].  
467 We added 23 to 1083 significant variants to those in Chip in different scenarios. In the  
468 most successful ones, at least around 200 significant variants were added and average  
469 improvements of prediction accuracy of 2.5 percentage points were observed with  
470 training sets of around 80k individuals. In other instances, however, additions of a

471 larger number of variants have been proposed. The addition of 1623 variants  
472 (preselected as the combination of 3-5 variants for each of the top QTL per trait and  
473 breed) to a 50k array increased prediction reliability (accuracy squared) by up to 5  
474 percentage points in Nordic cattle [29]. Adding the 16k SNPs with largest estimated  
475 effects to a 60k array increased prediction reliability on average by 2.7 (up to 4.8)  
476 percentage points in Holstein cattle [30]. For the custom 50k array for Hanwoo cattle,  
477 it has been reported that adding at least around 12k SNPs (3k for each of four traits)  
478 improved prediction accuracy by up to ~6 percentage points [32]. The addition of  
479 ~400 variants preselected by GWAS with regional heritability mapping to a 50k array  
480 increased prediction accuracy by 9 percentage points in sheep [31]. In other cases in  
481 Nordic cattle, however, the addition of ~1500 variants preselected by GWAS to a 54k  
482 panel produced negligible improvements in the prediction of traits with low  
483 heritability [65].

484 Preselecting an entirely new set of predictor variants from WGS, as in  
485 Top40k, proved more challenging than ChipPlusSign. In Top40k, we preselected the  
486 variants with the lowest p-value in each of consecutive non-overlapping 55-kb  
487 windows along the genome. This strategy did not perform much differently from just  
488 taking random variants from these windows, as in Rand40k. One possible reason for  
489 these results is that at this variant density, random variants effectively tag the same  
490 associations as Top40k thanks to linkage disequilibrium. Denser sets of predictor  
491 variants provided only small further improvements of prediction accuracy with  
492 diminishing returns.

493 The modest performance of ChipPlusSign and Top40k could also be a  
494 consequence of the difficulty for fine-mapping causal variants through GWAS with  
495 WGS. Theoretically, the identification of all causal variants associated with a trait

496 should enable the improvement of prediction accuracy [12]. Even though WGS allows  
497 the detection of a very large number of associations, problems such as false positives  
498 or p-value inflation also become more severe in a way that added noise might offset  
499 the detected signal. For instance, results in cattle showed that GWAS with WGS did  
500 not detect clearer associated regions relative to marker arrays and failed to capture  
501 QTL for genomic prediction [14], as the effect of potential QTL were spread across  
502 multiple variants. Therefore, WGS performed better with simple genetic architectures  
503 (i.e., traits with low number of QTN). This is consistent with expectations and  
504 simulation results [8] that indicated that the benefit of using WGS for genomic  
505 prediction would be limited by the number and size of QTN. When there are many  
506 QTN with small effects it becomes much more difficult to properly estimate their  
507 effects accurately. Therefore, for largely polygenic traits (as most traits of interest in  
508 livestock production), training sets need to be very large before WGS can increase  
509 prediction accuracy [8].

510         The advantage of using WGS might be limited by the current training set  
511 sizes, especially in scenarios where marker arrays are already yielding high prediction  
512 accuracy [14,20]. Multi-line training sets could be particularly beneficial with the use  
513 of WGS because they allow a larger training set with low pairwise relationship degree  
514 among individuals. Previous simulations suggested that WGS might be the most  
515 beneficial with multi-breed reference panels [66], especially for numerically small  
516 populations. Our results with a multi-line training set indicated that WGS can improve  
517 prediction accuracy in scenarios that are less optimised than within-line genomic  
518 prediction. The average improvements of prediction accuracy of 4.2 percentage points  
519 were observed for the populations that contributed around 80k individuals to the  
520 training set. However, in general those predictions were still less accurate than using

521 variants preselected under within-line training sets. In our multi-line scenarios we  
522 only used variation that segregated across all seven lines. We observed that  
523 population-specific variation accounted only for small fractions of genetic variance  
524 [53] and it seems unlikely that they would contribute much to prediction accuracy  
525 across breeds. Another possible obstacle is the differences in the allele substitution  
526 effects of the causal mutations across breeds. This can be caused by differences in  
527 allele frequency, contributions of non-additive effects and different genetic  
528 backgrounds, or even gene-by-environment interactions among others [24,67].

529         We observed low robustness of genomic prediction with WGS across traits  
530 and lines, and drops in prediction accuracy in those scenarios where genomic  
531 prediction with WGS failed. Regarding bias, we did not observe a systematic increase  
532 for ChipPlusSign despite using the same individuals for variant preselection and for  
533 training the predictors [16,63]. When we split the training set into two subsets, one for  
534 GWAS-based variant preselection and the other for training of the predictive  
535 equations, we did not observe any improvement in accuracy or bias. One hypothesis is  
536 that both subsets belong to the same population and therefore retained similar inter-  
537 relationship degrees (i.e., they are not strictly independent sets of individuals).  
538 Moreover, the reduction in individuals available for training the predictors negatively  
539 affected prediction accuracy.

540         We did not directly test persistence of prediction accuracy, but previous  
541 studies with real data found no higher persistence of prediction accuracy for WGS,  
542 not even with low degree of relationship between training and testing sets [14]. We  
543 would expect such obstacles to persistence of accuracy until causal variants can be  
544 successfully identified.

545



## Suboptimal strategy and pitfalls

546           The use of WGS for genomic prediction can only be reached after many other  
547 steps are completed to produce the genotypes at whole-genome level. Each of these  
548 steps has its pitfalls. It is unavoidable that the success of using of WGS is sensitive  
549 not only to the prediction methodology itself but also to the strategy followed until  
550 genotyping. This strategy includes the choice of which individuals to sequence, the  
551 bioinformatics pipeline to call variants, the imputation of the WGS and choice of  
552 variant filters. When combined with the multiplicity of prediction methods and the  
553 preselection of predictor variants (which is unavoidable with current datasets,  
554 predictive methodologies and computational capacities), there are many options and  
555 variables in the whole process that can affect the final result and that are not yet well  
556 understood. Therefore, a much greater effort for optimising such strategies is required.  
557 Here we tested relatively simple approaches to see how they performed with large  
558 WGS datasets. We have discussed what in our opinion are the main pitfalls of our  
559 approach for selection of the individuals to sequence [55] and the biases that may  
560 appear during processing of sequencing reads [50] elsewhere, and therefore here we  
561 will focus on imputation of WGS and its use for genomic prediction.

562

### 563 *Imputation accuracy*

564           It is widely recognized that imputation from marker arrays to WGS from very  
565 few sequenced individuals can introduce genotyping errors and that genotype  
566 uncertainty can be high [17,21,68,69]. The accuracy of the imputed WGS is one of the  
567 main factors that may limit its performance for genomic prediction. In a simulation  
568 study, van den Berg et al. [17] quantified the impact of imputation errors on

569 prediction accuracy and showed that prediction accuracy decreases as errors  
570 accumulate, especially in the testing set.

571 Imputation of WGS is particularly challenging because typically we have to  
572 impute a very large number of variants for a very large number of individuals from  
573 very few sequenced individuals. We assessed the imputation accuracy of our approach  
574 elsewhere [41,55] and recommended that ~2% of the population should be sequenced.  
575 In our study, line D was the line where prediction accuracy with Top40k performed  
576 the worst, mostly performing below Chip predictors. In this line, only 0.9% of the  
577 individuals in the population had been sequenced and therefore lower imputation  
578 accuracy could be expected. Although there was not enough evidence for establishing  
579 a link between these two features (sequencing effort and prediction accuracy), we  
580 recommend cautious design of a sequencing strategy that is suited to the intended  
581 imputation method [55].

582 Prediction accuracy could be improved by accounting for genotype uncertainty  
583 of the imputed WGS. For that, it could be advantageous to use allele dosages rather  
584 than best-guess genotypes [69], although most current implementations cannot handle  
585 such information.

586

### 587 ***Preselection of predictor variants***

588 Simply using WGS to increase the number of markers does not improve  
589 prediction accuracy [18,21,24]. Due to the large dimensionality of WGS, there is a  
590 need to remove uninformative variants [24,31,66,68,70]. Predictor variants must be  
591 causal or at least informative of the causal variants, which depends on the distance  
592 between the markers and the causal variants [13]. For this reason, variants that are in  
593 weak linkage disequilibrium with causal mutations have a ‘dilution’ effect, i.e., they

594 add noise and limit prediction accuracy [24,31,70]. However, if too stringent filters  
595 are applied during preselection of predictor variants, there is a risk of removing true  
596 causal variants, and that would debilitate persistence of accuracy across generations  
597 and across populations [66,71]. For instance, the impact of removing predictor  
598 variants with low minor allele frequency can vary depending on the minor allele  
599 frequency of the causal variants as well as the distance between predictor and causal  
600 variants [13]. Losing causal or informative variants would negatively affect multi-line  
601 or multi-breed prediction.

602 A popular strategy to preselect the predictor variants is based on association  
603 tests. Genome-wide association studies on WGS are expected to confirm associations  
604 that were already detected with marker arrays and identify novel associations (e.g.,  
605 [36,72]). However, preliminary inspection of our GWAS results for the real traits  
606 showed that the added noise could easily offset the added information and fine-  
607 mapping remains challenging. Multi-breed GWAS [4] and meta-analyses [73] are  
608 suitable alternatives for GWAS to accommodate much larger population sizes and for  
609 combining results of populations with diverse genetic backgrounds. Multi-breed  
610 GWAS can be more efficient to identify informative variants than single-breed  
611 GWAS, which may benefit even prediction within lines [74]. Because the signal of  
612 some variants may go undetected for some traits but not for other correlated traits,  
613 combining GWAS information of several traits can also help identifying weak or  
614 moderate associations [25]. We did not test whether combining the significant  
615 markers from the different single-trait GWAS yielded greater improvements in  
616 prediction accuracy [29,32]. Multi-trait GWAS models could be more suited for that  
617 purpose [72,75]. To improve fine-mapping, other GWAS models that incorporate

618 biological information have been proposed (e.g., functional annotation [76] or  
619 metabolomics [77]).

620 There have been other suggested methods that may improve variant  
621 preselection for genomic prediction. VanRaden et al. [30] suggested that preselecting  
622 variants based on the genetic variance that they contribute rather than the significance  
623 of the association could be more advantageous, as the former would indirectly  
624 preselect variance with higher minor allele frequency. Other authors proposed  
625 preselection of variants using statistics that do not depend on GWAS, such as the  
626 fixation index ( $F_{ST}$ ) score between groups of individuals with high and low phenotype  
627 values [70], as an alternative to avoid the negative impact of spurious associations.

628 Preselecting predictor variants based on functional annotation was not useful,  
629 as it reduced prediction accuracy in several traits and lines. Previous studies showed  
630 that subsets of variants based on functionality either did not improve or reduced  
631 prediction accuracy [20] and that adding preselected variants from coding regions to  
632 marker arrays produced lower prediction accuracy than just adding the same number  
633 of variants without considering functional classification [32]. A plausible explanation  
634 is that functional variants are enriched for lower minor allele frequency, which can be  
635 less informative for prediction [13]. Furthermore, functional annotation does not  
636 necessarily capture true effects, and the method we used is biased towards protein-  
637 coding variants, which may lead to an underrepresentation of functional non-coding  
638 variants that may explain a large fraction of quantitative trait variance. Xiang et al.  
639 [78] found that expression QTL and non-coding variants explained more variation in  
640 quantitative traits in cattle than protein-coding functional variants. When functional  
641 annotation is not considered, intergenic variants are more likely to be preselected by  
642 chance. Such variants tend to be more common and widespread across populations,

643 and therefore can act as tag variants and capture much larger fractions of trait variance  
644 [53].

645 Another popular strategy to reduce the number of variants is to prune variants  
646 based on linkage disequilibrium (LDTags). This strategy performed very poorly in our  
647 populations. Other studies reported different outcomes, where pruning for  $r^2 > 0.9$   
648 provided positive results [18,21]. It is possible that this was in part due to the stringent  
649 threshold ( $r^2 > 0.1$ ) that we used in order to retain only a small number of variants.

650

### 651 *New models and methods*

652 It is also likely that models, methods, and their implementations need to be  
653 improved to handle the complexity of WGS and to efficiently estimate marker effects  
654 of so many variants with high accuracy, among other features. This is a very active  
655 area of research and multiple novel methodologies have been proposed over the last  
656 years. Some examples are a combination of subsampling and Gibbs sampling [79],  
657 and a model that simultaneously fits a GBLUP term for a polygenic effect and a  
658 BayesC term for variants with large effects selected by the model (BayesGC) [26].  
659 Testing alternative models and methods for genomic prediction was out of the scope  
660 of this report. However, together with refinements in the preselection of predictor  
661 variants, it remains an interesting avenue for further optimisation of the analysis  
662 pipeline.

663 Some of the most promising methods are designed to incorporate prior  
664 biological information into the models. One of such methods is BayesRC [23], which  
665 extends BayesR by assigning flatter prior distributions to classes of variants that are  
666 more likely to be causal [19,22]. Similarly, GFBLUP [80] could be used to  
667 incorporate prior biological information from either QTL databases or GWAS as

668 genomic features [21,35,68]. The model MBMG [27], which fits two genomic  
669 relationship matrices according to prior biological information, has also been  
670 proposed for multi-breed scenarios to improve genomic prediction in small  
671 populations. Haplotype-based prediction methods could provide greater prediction  
672 accuracy with WGS than SNP-based methods in pigs [81] and cattle [82]. These  
673 methods reduce the number of model dimensions. However, the uptake of such  
674 methods has been limited so far due to their greater complexity, for example, to define  
675 haplotype blocks.

676

## Conclusion

677 Our results evidenced the potential for WGS to improve genomic prediction  
678 accuracy in intensely selected pig lines. The performance of each set of predictor  
679 variants was not robust across traits and lines and the improvements that we achieved  
680 so far were modest at best. The most robust results were obtained when variants that  
681 showed statistically significant associations to the trait were preselected and added to  
682 the marker array. With this method, average improvements of prediction accuracy of  
683 2.5 and 4.2 percentage points were observed in within-line and multi-line scenarios,  
684 respectively, with training sets of around 80k individuals. We would expect that a  
685 combination of larger training sets and improved pipelines could help achieve greater  
686 improvements of prediction accuracy. The robustness of the whole strategy for  
687 generating WGS at the population level must be carefully stress-tested and further  
688 optimised.

689

## **Ethics approval and consent to participate**

690 The samples used in this study were derived from the routine breeding activities of  
691 PIC.

## **Consent for publication**

692 Not applicable.

## **Availability of data and material**

693 The software packages AlphaSeqOpt, AlphaPhase, AlphaImpute and AlphaPeel are  
694 available from the AlphaGenes website (<http://www.alphagenes.roslin.ed.ac.uk>). The  
695 datasets generated and analysed in this study are derived from the PIC breeding  
696 programme and not publicly available.

## **Competing interests**

697 The authors declare that they have no competing interests. BDV, CYC, and WOH are  
698 employees of Genus PIC.

## **Funding**

699 The authors acknowledge the financial support from the BBSRC ISPG to The Roslin  
700 Institute (BBS/E/D/30002275), from Genus plc, Innovate UK (grant 102271), and  
701 from grant numbers BB/N004736/1, BB/N015339/1, BB/L020467/1, and  
702 BB/M009254/1. MJ acknowledges financial support from the Swedish Research  
703 Council for Sustainable Development Formas Dnr 2016-01386.

## **Authors' contributions**

704 RRF, GG and JMH designed the study; CYC assisted in preparing the datasets; RRF,  
705 AW and MJ performed the analyses; RRF wrote the first draft; AW, CYC, BDV,

706 WHO, GG and JMH assisted in the interpretation of the results and provided  
707 comments on the manuscript. All authors read and approved the final manuscript.

## Acknowledgements

708 This work has made use of the resources provided by the Edinburgh Compute and  
709 Data Facility (ECDF) (<http://www.ecdf.ed.ac.uk/>).

710

## References

- 711 1. Pasaniuc B, Rohland N, McLaren PJ, Garimella K, Zaitlen N, Li H, et al.  
712 Extremely low-coverage sequencing and imputation increases power for genome-  
713 wide association studies. *Nat Genet.* 2012;44:631–5.
- 714 2. Daetwyler HD, Capitan A, Pausch H, Stothard P, van Binsbergen R, Brondum RF,  
715 et al. Whole-genome sequencing of 234 bulls facilitates mapping of monogenic and  
716 complex traits in cattle. *Nat Genet.* 2014;46:858–65.
- 717 3. Nicod J, Davies RW, Cai N, Hassett C, Goodstadt L, Cosgrove C, et al. Genome-  
718 wide association of multiple complex traits in outbred mice by ultra-low-coverage  
719 sequencing. *Nat Genet.* 2016;48:912–8.
- 720 4. Sanchez M-P, Govignon-Gion A, Croiseau P, Fritz S, Hozé C, Miranda G, et al.  
721 Within-breed and multi-breed GWAS on imputed whole-genome sequence variants  
722 reveal candidate mutations affecting milk protein composition in dairy cattle. *Genet*  
723 *Sel Evol.* 2017;49:68.
- 724 5. Das A, Panitz F, Gregersen VR, Bendixen C, Holm L-E. Deep sequencing of  
725 Danish Holstein dairy cattle for variant detection and insight into potential loss-of-  
726 function variants in protein coding genes. *BMC Genomics.* 2015;16:1043.
- 727 6. Gudbjartsson DF, Helgason H, Gudjonsson SA, Zink F, Oddson A, Gylfason A, et  
728 al. Large-scale whole-genome sequencing of the Icelandic population. *Nat Genet.*  
729 2015;47:435–44.
- 730 7. VanRaden PM. Symposium review: How to implement genomic selection. *J Dairy*  
731 *Sci.* 2020;103:5291–301.
- 732 8. Clark SA, Hickey JM, van der Werf JH. Different models of genetic variation and  
733 their effect on genomic evaluation. *Genet Sel Evol.* 2011;43:18.
- 734 9. Druet T, Macleod IM, Hayes BJ. Toward genomic prediction from whole-genome  
735 sequence data: impact of sequencing design on genotype imputation and accuracy of  
736 predictions. *Heredity.* 2014;112:39–47.



- 737 10. MacLeod IM, Hayes BJ, Goddard ME. The Effects of Demography and Long-  
738 Term Selection on the Accuracy of Genomic Prediction with Sequence Data.  
739 *Genetics*. 2014;198:1671–84.
- 740 11. Meuwissen T, Goddard M. Accurate Prediction of Genetic Values for Complex  
741 Traits by Whole-Genome Resequencing. *Genetics*. 2010;185:623–31.
- 742 12. Pérez-Enciso M, Rincón JC, Legarra A. Sequence- vs. chip-assisted genomic  
743 selection: accurate biological information is advised. *Genet Sel Evol*. 2015;47:43.
- 744 13. van den Berg I, Boichard D, Guldbbrandtsen B, Lund MS. Using Sequence  
745 Variants in Linkage Disequilibrium with Causative Mutations to Improve Across-  
746 Breed Prediction in Dairy Cattle: A Simulation Study. *G3 GenesGenomesGenetics*.  
747 2016;6:2553–61.
- 748 14. van Binsbergen R, Calus MPL, Bink MCAM, van Eeuwijk FA, Schrooten C,  
749 Veerkamp RF. Genomic prediction using imputed whole-genome sequence data in  
750 Holstein Friesian cattle. *Genet Sel Evol*. 2015;47:71.
- 751 15. Calus MPL, Bouwman AC, Schrooten C, Veerkamp RF. Efficient genomic  
752 prediction based on whole-genome sequence data using split-and-merge Bayesian  
753 variable selection. *Genet Sel Evol*. 2016;48:49.
- 754 16. Veerkamp RF, Bouwman AC, Schrooten C, Calus MPL. Genomic prediction  
755 using preselected DNA variants from a GWAS with whole-genome sequence data in  
756 Holstein–Friesian cattle. *Genet Sel Evol*. 2016;48:95.
- 757 17. van den Berg I, Bowman PJ, MacLeod IM, Hayes BJ, Wang T, Bolormaa S, et al.  
758 Multi-breed genomic prediction using Bayes R with sequence data and dropping  
759 variants with a small effect. *Genet Sel Evol*. 2017;49:70.
- 760 18. Frischknecht M, Meuwissen THE, Bapst B, Seefried FR, Flury C, Garrick D, et al.  
761 Short communication: Genomic prediction using imputed whole-genome sequence  
762 variants in Brown Swiss Cattle. *J Dairy Sci*. 2018;101:1292–6.
- 763 19. Hayes BJ, MacLeod IM, Daetwyler HD, Bowman PJ, Chamberlain AJ, Vander  
764 Jagt CJ, et al. Genomic prediction from whole genome sequence in livestock: the  
765 1000 Bull Genomes Project. *Proc 10th World Congr Genet Appl Livest Prod*  
766 *WCGALP*. Vancouver, BC, Canada; 2014. p. 183.
- 767 20. Heidaritabar M, Calus MPL, Megens H-J, Vereijken A, Groenen MAM,  
768 Bastiaansen JWM. Accuracy of genomic prediction using imputed whole-genome  
769 sequence data in white layers. *J Anim Breed Genet*. 2016;133:167–79.
- 770 21. Song H, Ye S, Jiang Y, Zhang Z, Zhang Q, Ding X. Using imputation-based  
771 whole-genome sequencing data to improve the accuracy of genomic prediction for  
772 combined populations in pigs. *Genet Sel Evol*. 2019;51:58.
- 773 22. Zhang C, Kemp RA, Stothard P, Wang Z, Boddicker N, Krivushin K, et al.  
774 Genomic evaluation of feed efficiency component traits in Duroc pigs using 80K,  
775 650K and whole-genome sequence variants. *Genet Sel Evol*. 2018;50:14.

- 776 23. MacLeod IM, Bowman PJ, Vander Jagt CJ, Haile-Mariam M, Kemper KE,  
777 Chamberlain AJ, et al. Exploiting biological priors and sequence variants enhances  
778 QTL discovery and genomic prediction of complex traits. *BMC Genomics*.  
779 2016;17:144.
- 780 24. Raymond B, Bouwman AC, Schrooten C, Houwing-Duistermaat J, Veerkamp RF.  
781 Utility of whole-genome sequence data for across-breed genomic prediction. *Genet  
782 Sel Evol*. 2018;50:27.
- 783 25. Xiang R, MacLeod IM, Daetwyler HD, de Jong G, O'Connor E, Schrooten C, et  
784 al. Genome-wide fine-mapping identifies pleiotropic and functional variants that  
785 predict many traits across global cattle populations. *Nat Commun*. 2021;12:860.
- 786 26. Meuwissen T, van den Berg I, Goddard M. On the use of whole-genome sequence  
787 data for across-breed genomic prediction and fine-scale mapping of QTL. *Genet Sel  
788 Evol*. 2021;53:19.
- 789 27. Raymond B, Bouwman AC, Wientjes YCJ, Schrooten C, Houwing-Duistermaat J,  
790 Veerkamp RF. Genomic prediction for numerically small breeds, using models with  
791 pre-selected and differentially weighted markers. *Genet Sel Evol*. 2018;50:49.
- 792 28. Moghaddar N, Brown DJ, Swan AA, Gurman PM, Li L, Werf JH. Genomic  
793 prediction in a numerically small breed population using prioritized genetic markers  
794 from whole-genome sequence data. *J Anim Breed Genet*. 2021;
- 795 29. Brøndum RF, Su G, Janss L, Sahana G, Guldbbrandtsen B, Boichard D, et al.  
796 Quantitative trait loci markers derived from whole genome sequence data increases  
797 the reliability of genomic prediction. *J Dairy Sci*. 2015;98:4107–16.
- 798 30. VanRaden PM, Tooker ME, O'Connell JR, Cole JB, Bickhart DM. Selecting  
799 sequence variants to improve genomic predictions for dairy cattle. *Genet Sel Evol*.  
800 2017;49:32.
- 801 31. Al Kalaldehy M, Gibson J, Duijvesteijn N, Daetwyler HD, MacLeod I, Moghaddar  
802 N, et al. Using imputed whole-genome sequence data to improve the accuracy of  
803 genomic prediction for parasite resistance in Australian sheep. *Genet Sel Evol*.  
804 2019;51:32.
- 805 32. Lopez BIM, An N, Srikanth K, Lee S, Oh J-D, Shin D-H, et al. Genomic  
806 Prediction Based on SNP Functional Annotation Using Imputed Whole-Genome  
807 Sequence Data in Korean Hanwoo Cattle. *Front Genet*. 2021;11:603822.
- 808 33. Hayes BJ, Daetwyler HD. 1000 Bull Genomes Project to Map Simple and  
809 Complex Genetic Traits in Cattle: Applications and Outcomes. *Annu Rev Anim  
810 Biosci*. 2019;7:89–102.
- 811 34. Sanchez M-P, Guatteo R, Davergne A, Saout J, Grohs C, Deloche M-C, et al.  
812 Identification of the ABCC4, IER3, and CBFA2T2 candidate genes for resistance to  
813 paratuberculosis from sequence-based GWAS in Holstein and Normande dairy cattle.  
814 *Genet Sel Evol*. 2020;52:14.

- 815 35. Yang R, Xu Z, Wang Q, Zhu D, Bian C, Ren J, et al. Genome-wide association  
816 study and genomic prediction for growth traits in yellow-plumage chicken using  
817 genotyping-by-sequencing. *Genet Sel Evol.* 2021;53:82.
- 818 36. Yan G, Liu X, Xiao S, Xin W, Xu W, Li Y, et al. An imputed whole-genome  
819 sequence-based GWAS approach pinpoints causal mutations for complex traits in a  
820 specific swine population. *Sci China Life Sci.* 2021;
- 821 37. Yang R, Guo X, Zhu D, Tan C, Bian C, Ren J, et al. Accelerated deciphering of  
822 the genetic architecture of agricultural economic traits in pigs using a low-coverage  
823 whole-genome sequencing strategy. *GigaScience.* 2021;10:giab048.
- 824 38. Li Y, Sidore C, Kang HM, Boehnke M, Abecasis GR. Low-coverage sequencing:  
825 Implications for design of complex trait association studies. *Genome Res.*  
826 2011;21:940–51.
- 827 39. Hickey JM. Sequencing millions of animals for genomic selection 2.0. *J Anim*  
828 *Breed Genet.* 2013;130:331–2.
- 829 40. Hickey JM, Gorjanc G, Cleveland MA, Kranis A, Jenko J, Mészáros G, et al.  
830 Sequencing Millions of Animals for Genomic Selection 2.0. *Proc 10th World Congr*  
831 *Genet Appl Livest Prod WCGALP.* Vancouver, BC, Canada; 2014. p. 377.
- 832 41. Ros-Freixedes R, Whalen A, Chen C-Y, Gorjanc G, Herring WO, Mileham AJ, et  
833 al. Accuracy of whole-genome sequence imputation using hybrid peeling in large  
834 pedigreed livestock populations. *Genet Sel Evol.* 2020;52:17.
- 835 42. Gonen S, Ros-Freixedes R, Battagin M, Gorjanc G, Hickey JM. A method for the  
836 allocation of sequencing resources in genotyped livestock populations. *Genet Sel*  
837 *Evol.* 2017;49:47.
- 838 43. Ros-Freixedes R, Gonen S, Gorjanc G, Hickey JM. A method for allocating low-  
839 coverage sequencing resources by targeting haplotypes rather than individuals. *Genet*  
840 *Sel Evol.* 2017;49:78.
- 841 44. Hickey JM, Kinghorn BP, Tier B, Wilson JF, Dunstan N, van der Werf JH. A  
842 combined long-range phasing and long haplotype imputation method to impute phase  
843 for SNP genotypes. *Genet Sel Evol.* 2011;43:12.
- 844 45. Hickey JM, Kinghorn BP, Tier B, van der Werf JH, Cleveland MA. A phasing  
845 and imputation method for pedigreed populations that results in a single-stage  
846 genomic evaluation. *Genet Sel Evol.* 2012;44:9.
- 847 46. Bolger AM, Lohse M, Usadel B. Trimmomatic: a flexible trimmer for Illumina  
848 sequence data. *Bioinformatics.* 2014;30:2114–20.
- 849 47. Li H. Aligning sequence reads, clone sequences and assembly contigs with BWA-  
850 MEM. *arXiv.* 2013;1303.3997v1 [q – bio.GN].

- 851 48. DePristo MA, Banks E, Poplin R, Garimella KV, Maguire JR, Hartl C, et al. A  
852 framework for variation discovery and genotyping using next-generation DNA  
853 sequencing data. *Nat Genet.* 2011;43:491–8.
- 854 49. Poplin R, Ruano-Rubio V, DePristo MA, Fennell TJ, Carneiro MO, Van der  
855 Auwera GA, et al. Scaling accurate genetic variant discovery to tens of thousands of  
856 samples. *bioRxiv.* 2018;10.1101/201178.
- 857 50. Ros-Freixedes R, Battagin M, Johnsson M, Gorjanc G, Mileham AJ, Rounsley  
858 SD, et al. Impact of index hopping and bias towards the reference allele on accuracy  
859 of genotype calls from low-coverage sequencing. *Genet Sel Evol.* 2018;50:64.
- 860 51. Li H, Handsaker B, Wysoker A, Fennell T, Ruan J, Homer N, et al. The Sequence  
861 Alignment/Map format and SAMtools. *Bioinformatics.* 2009;25:2078–9.
- 862 52. Danecek P, Auton A, Abecasis G, Albers CA, Banks E, DePristo MA, et al. The  
863 variant call format and VCFtools. *Bioinformatics.* 2011;27:2156–8.
- 864 53. Ros-Freixedes R, Valente B, Chen C-Y, Herring WO, Gorjanc G, Hickey JM, et  
865 al. Rare and population-specific functional variants across pig lines. *bioRxiv*  
866 [Internet]. 2022; Available from: <https://doi.org/10.1101/2022.02.01.478603>
- 867 54. Whalen A, Ros-Freixedes R, Wilson DL, Gorjanc G, Hickey JM. Hybrid peeling  
868 for fast and accurate calling, phasing, and imputation with sequence data of any  
869 coverage in pedigrees. *Genet Sel Evol.* 2018;50:67.
- 870 55. Ros-Freixedes R, Whalen A, Gorjanc G, Mileham AJ, Hickey JM. Evaluation of  
871 sequencing strategies for whole-genome imputation with hybrid peeling. *Genet Sel*  
872 *Evol.* 2020;52:18.
- 873 56. VanRaden PM, Wiggans GR. Derivation, Calculation, and Use of National  
874 Animal Model Information. *J Dairy Sci.* 1991;74:2737–46.
- 875 57. Lippert C, Listgarten J, Liu Y, Kadie CM, Davidson RI, Heckerman D. FaST  
876 linear mixed models for genome-wide association studies. *Nat Methods.* 2011;8:833–  
877 5.
- 878 58. Widmer C, Lippert C, Weissbrod O, Fusi N, Kadie C, Davidson R, et al. Further  
879 Improvements to Linear Mixed Models for Genome-Wide Association Studies. *Sci*  
880 *Rep.* 2015;4:6874.
- 881 59. Chang CC, Chow CC, Tellier LC, Vattikuti S, Purcell SM, Lee JJ. Second-  
882 generation PLINK: rising to the challenge of larger and richer datasets. *GigaScience.*  
883 2015;4.
- 884 60. McLaren W, Gil L, Hunt SE, Riat HS, Ritchie GRS, Thormann A, et al. The  
885 Ensembl Variant Effect Predictor. *Genome Biol.* 2016;17:122.
- 886 61. Erbe M, Hayes BJ, Matukumalli LK, Goswami S, Bowman PJ, Reich CM, et al.  
887 Improving accuracy of genomic predictions within and between dairy cattle breeds  
888 with imputed high-density single nucleotide polymorphism panels. *J Dairy Sci.*  
889 2012;95:4114–29.

- 890 62. Moser G, Lee SH, Hayes BJ, Goddard ME, Wray NR, Visscher PM. Simultaneous  
891 Discovery, Estimation and Prediction Analysis of Complex Traits Using a Bayesian  
892 Mixture Model. Haley C, editor. PLOS Genet. 2015;11:e1004969.
- 893 63. MacLeod IM, Bolormaa S, Schrooten C, Goddard ME, Daetwyler H. Pitfalls of  
894 pre-selecting subsets of sequence variants for genomic prediction. Proc 22nd Conf  
895 Assoc Adv Anim Breed Genet AAABG. Townsville, Queensland, Australia; 2017. p.  
896 141–4.
- 897 64. Gozalo-Marcilla M, Buntjer J, Johnsson M, Batista L, Diez F, Werner CR, et al.  
898 Genetic architecture and major genes for backfat thickness in pig lines of diverse  
899 genetic backgrounds. Genet Sel Evol. 2021;53:76.
- 900 65. Gebreyesus G, Lund MS, Sahana G, Su G. Reliabilities of Genomic Prediction for  
901 Young Stock Survival Traits Using 54K SNP Chip Augmented With Additional  
902 Single-Nucleotide Polymorphisms Selected From Imputed Whole-Genome  
903 Sequencing Data. Front Genet. 2021;12:667300.
- 904 66. Iheshiulor OOM, Woolliams JA, Yu X, Wellmann R, Meuwissen THE. Within-  
905 and across-breed genomic prediction using whole-genome sequence and single  
906 nucleotide polymorphism panels. Genet Sel Evol. 2016;48:15.
- 907 67. Legarra A, Garcia-Baccino CA, Wientjes YCJ, Vitezica ZG. The correlation of  
908 substitution effects across populations and generations in the presence of non-additive  
909 functional gene action. PREPRINT. 2021;
- 910 68. Sarup P, Jensen J, Ostersen T, Henryon M, Sørensen P. Increased prediction  
911 accuracy using a genomic feature model including prior information on quantitative  
912 trait locus regions in purebred Danish Duroc pigs. BMC Genet. 2016;17:11.
- 913 69. Pausch H, MacLeod IM, Fries R, Emmerling R, Bowman PJ, Daetwyler HD, et al.  
914 Evaluation of the accuracy of imputed sequence variant genotypes and their utility for  
915 causal variant detection in cattle. Genet Sel Evol. 2017;49:24.
- 916 70. Ling AS, Hay EH, Aggrey SE, Rekaya R. Dissection of the impact of prioritized  
917 QTL-linked and -unlinked SNP markers on the accuracy of genomic selection. BMC  
918 Genomic Data. 2021;22:26.
- 919 71. Fragomeni BO, Lourenco DAL, Masuda Y, Legarra A, Misztal I. Incorporation of  
920 causative quantitative trait nucleotides in single-step GBLUP. Genet Sel Evol.  
921 2017;49:59.
- 922 72. Bolormaa S, Swan AA, Stothard P, Khansefid M, Moghaddar N, Duijvesteijn N,  
923 et al. A conditional multi-trait sequence GWAS discovers pleiotropic candidate genes  
924 and variants for sheep wool, skin wrinkle and breech cover traits. Genet Sel Evol.  
925 2021;53:58.
- 926 73. van den Berg I, Xiang R, Jenko J, Pausch H, Boussaha M, Schrooten C, et al.  
927 Meta-analysis for milk fat and protein percentage using imputed sequence variant  
928 genotypes in 94,321 cattle from eight cattle breeds. Genet Sel Evol. 2020;52:37.

- 929 74. van den Berg I, Boichard D, Lund MS. Sequence variants selected from a multi-  
930 breed GWAS can improve the reliability of genomic predictions in dairy cattle. *Genet*  
931 *Sel Evol.* 2016;48:83.
- 932 75. Yoshida GM, Yáñez JM. Multi-trait GWAS using imputed high-density  
933 genotypes from whole-genome sequencing identifies genes associated with body traits  
934 in Nile tilapia. *BMC Genomics.* 2021;22:57.
- 935 76. Yang J, Fritsche LG, Zhou X, Abecasis G. A Scalable Bayesian Method for  
936 Integrating Functional Information in Genome-wide Association Studies. *Am J Hum*  
937 *Genet.* 2017;101:404–16.
- 938 77. Li J, Mukiibi R, Wang Y, Plastow GS, Li C. Identification of candidate genes and  
939 enriched biological functions for feed efficiency traits by integrating plasma  
940 metabolites and imputed whole genome sequence variants in beef cattle. *BMC*  
941 *Genomics.* 2021;22:823.
- 942 78. Xiang R, Berg I van den, MacLeod IM, Hayes BJ, Prowse-Wilkins CP, Wang M,  
943 et al. Quantifying the contribution of sequence variants with regulatory and  
944 evolutionary significance to 34 bovine complex traits. *Proc Natl Acad Sci.*  
945 2019;116:19398–408.
- 946 79. Xavier A, Xu S, Muir W, Rainey KM. Genomic prediction using subsampling.  
947 *BMC Bioinformatics.* 2017;18:191.
- 948 80. Edwards SM, Sørensen IF, Sarup P, Mackay TFC, Sørensen P. Genomic  
949 Prediction for Quantitative Traits Is Improved by Mapping Variants to Gene Ontology  
950 Categories in *Drosophila melanogaster*. *Genetics.* 2016;203:1871–83.
- 951 81. Bian C, Prakapenka D, Tan C, Yang R, Zhu D, Guo X, et al. Haplotype genomic  
952 prediction of phenotypic values based on chromosome distance and gene boundaries  
953 using low-coverage sequencing in Duroc pigs. *Genet Sel Evol.* 2021;53:78.
- 954 82. Li H, Zhu B, Xu L, Wang Z, Xu L, Zhou P, et al. Genomic Prediction Using LD-  
955 Based Haplotypes Inferred From High-Density Chip and Imputed Sequence Variants  
956 in Chinese Simmental Beef Cattle. *Front Genet.* 2021;12:665382.

957

958

959



## Figures

960

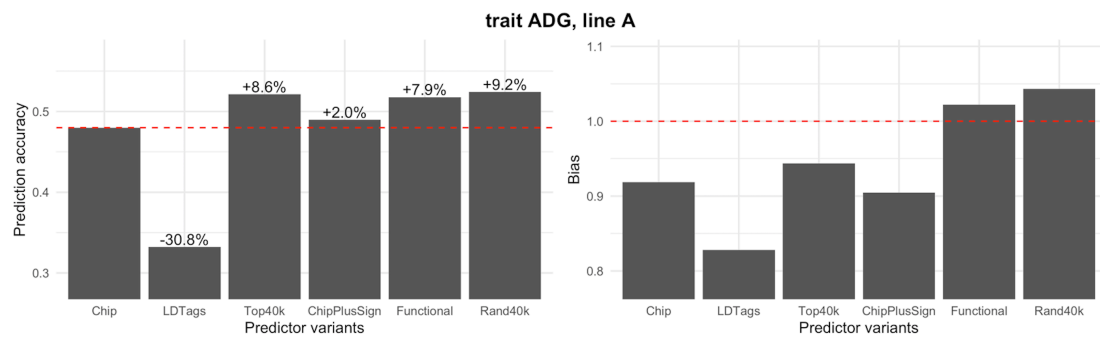

961

962

**Figure 1.** Prediction accuracy for each set of predictor variants for trait ADG in line

963

A. Left: Correlation (left). Dashed line at value of Chip as a reference. Values indicate

964

relative difference to Chip. Right: Bias. Dashed line at the ideal value.

965

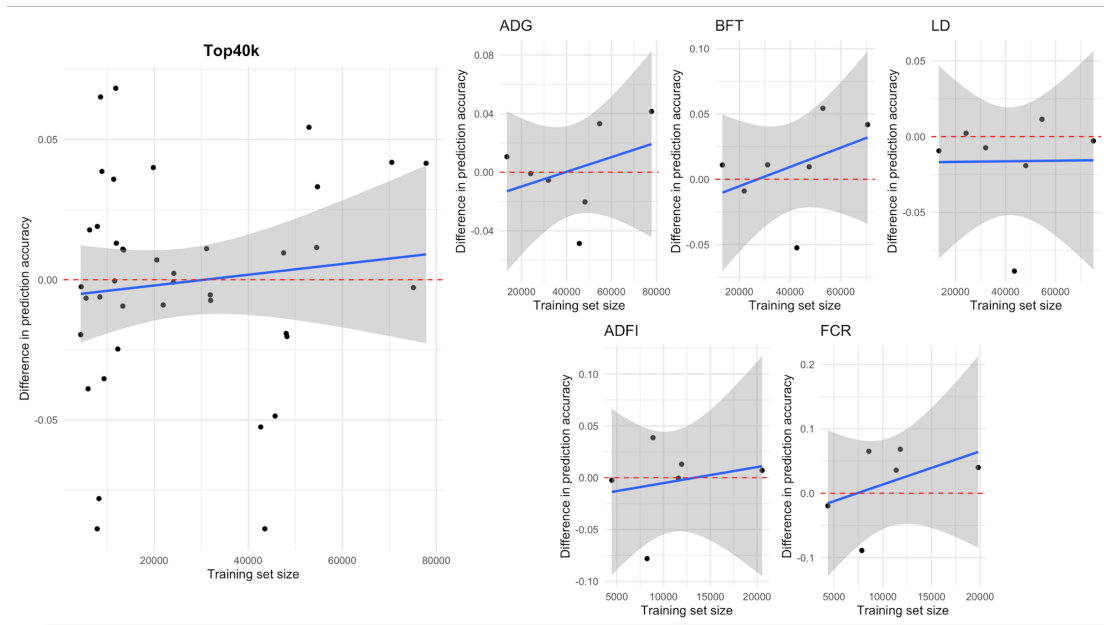

966

967

**Figure 2.** Genomic prediction accuracy with the Top40k predictor variants for the

968

real traits. The difference of prediction accuracy between Top40k and Chip is shown,

969

for all traits and lines (left) or by trait (right). Red dashed line at ‘no difference’.

970

971



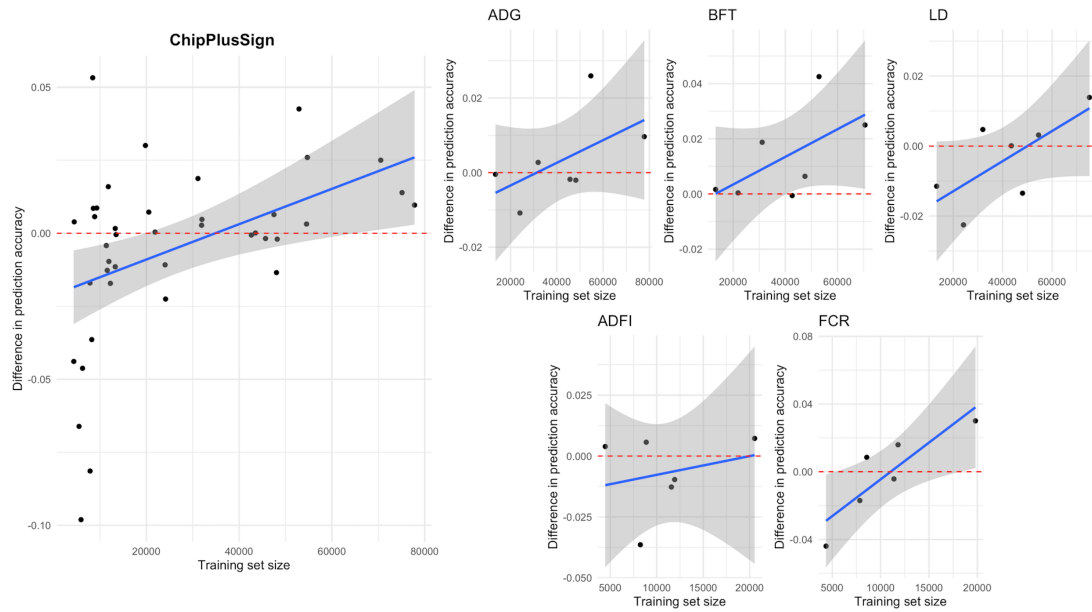

972

973 **Figure 3.** Genomic prediction accuracy with the ChipPlusSign predictor variants for  
974 the real traits. The difference of prediction accuracy between ChipPlusSign and Chip  
975 is shown, for all traits and lines (left) or by trait (right). Red dashed line at 'no  
976 difference'.

977

978

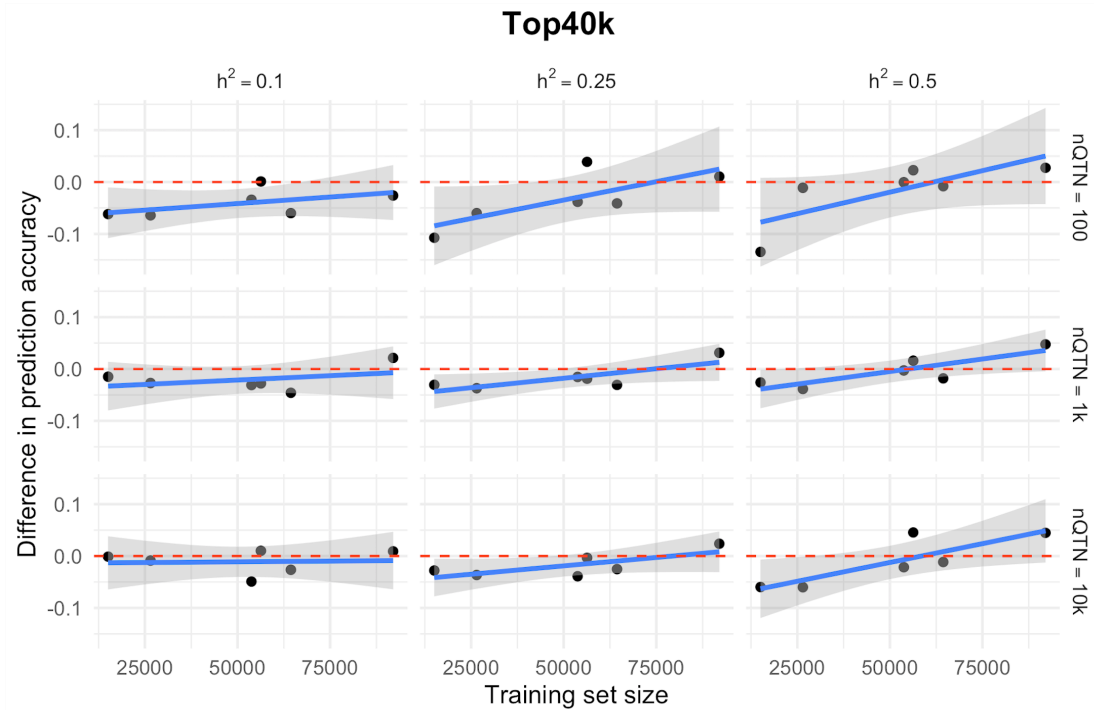

979

980

**Figure 4.** Genomic prediction accuracy with the Top40k predictor variants for the

981

simulated traits. The difference of prediction accuracy between Top40k and Chip is

982

shown by heritability ( $h^2$ ) and number of quantitative trait nucleotides ( $nQTN$ ) of the

983

simulated traits. Red dashed line at 'no difference'.

984

985

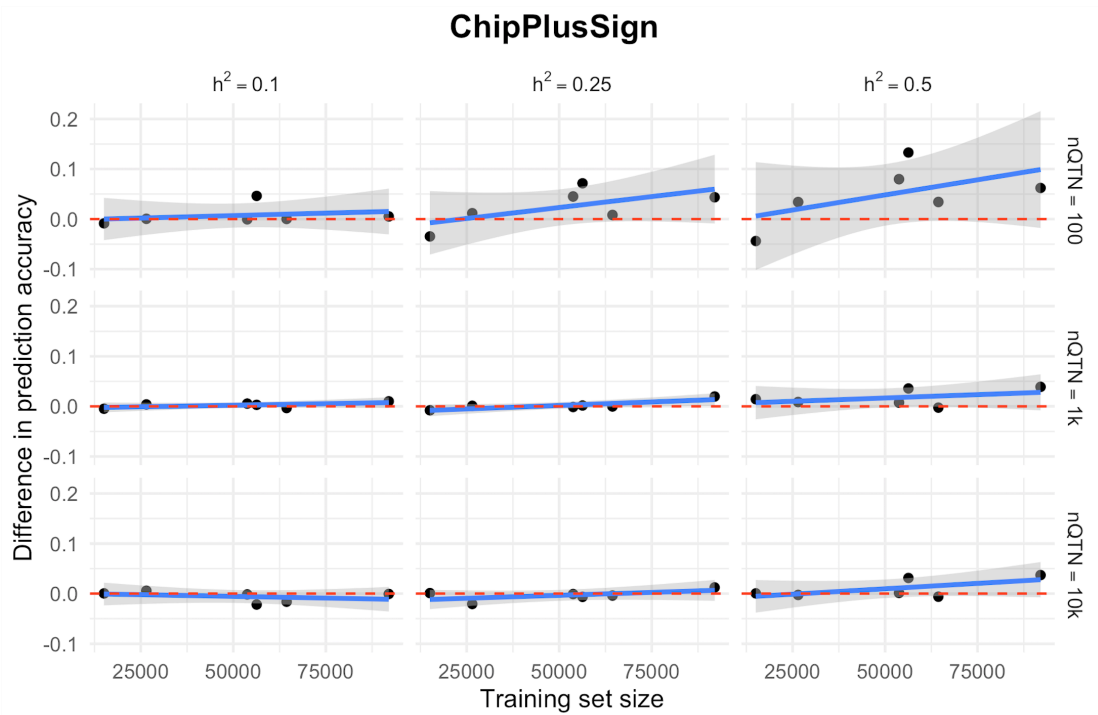

986

987

**Figure 5.** Genomic prediction accuracy with the ChipPlusSign predictor variants for

988

the simulated traits. The difference of prediction accuracy between ChipPlusSign and

989

Chip is shown by heritability ( $h^2$ ) and number of quantitative trait nucleotides (nQTN)

990

of the simulated traits. Red dashed line at 'no difference'.

991

992

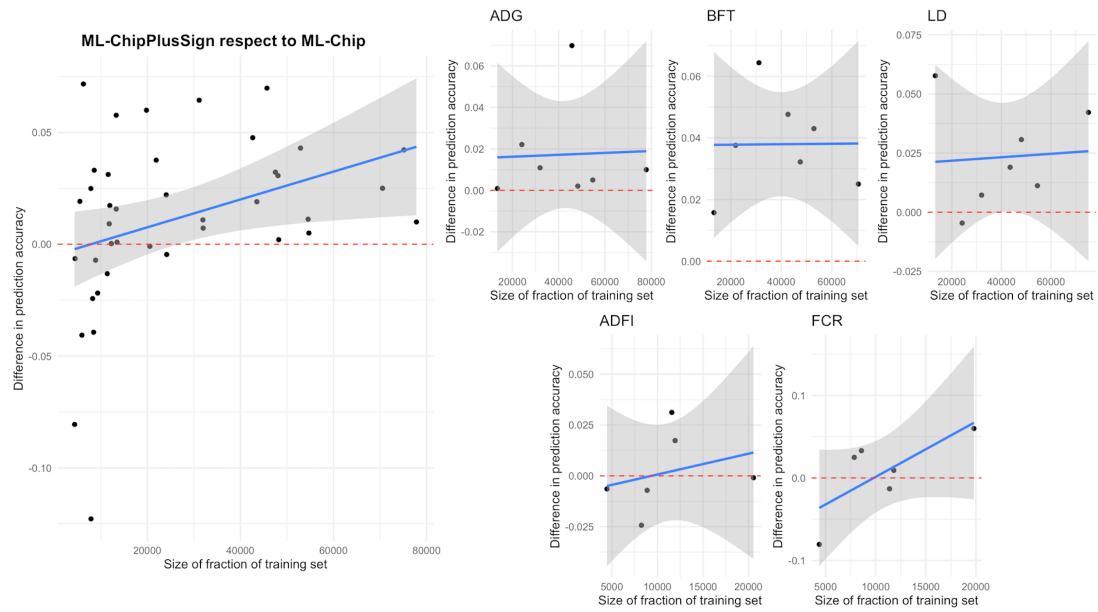

993

994

**Figure 6.** Genomic prediction accuracy with the ML-ChipPlusSign predictor variants

995

for the real traits. The difference of prediction accuracy between ML-ChipPlusSign

996

and ML-Chip is shown, for all traits and lines (left) or by trait (right). Red dashed line

997

at ‘no difference’.

998

999

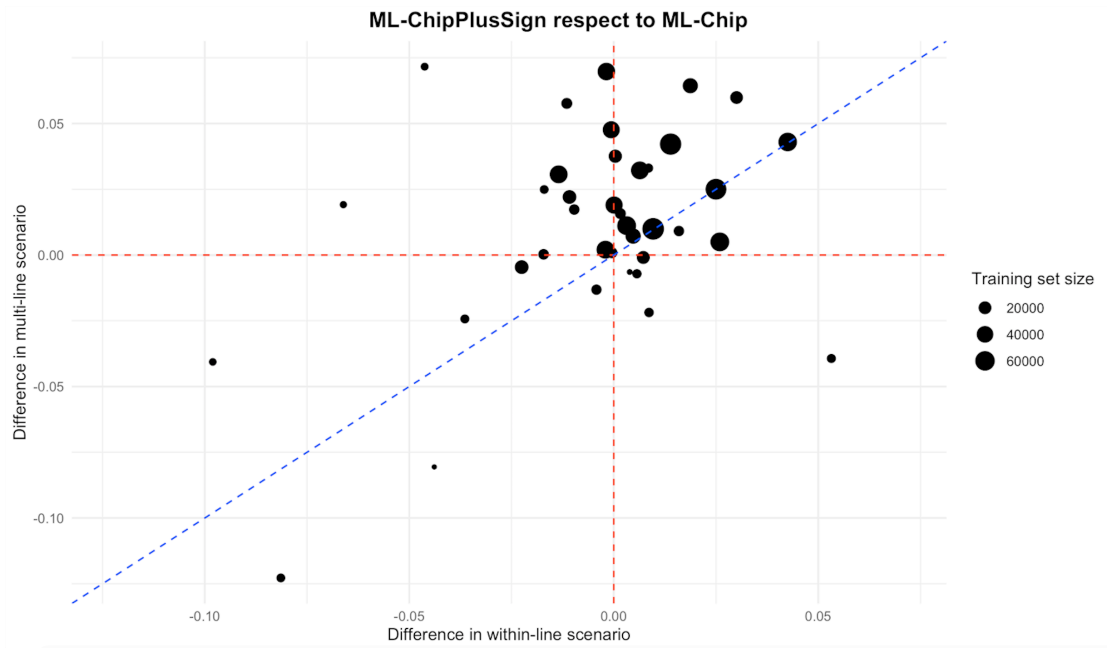

1000

1001 **Figure 7.** Comparison of the difference in genomic prediction accuracy in the multi-

1002 line scenarios (between ML-ChipPlusSign and ML-Chip) and in the within-line

1003 scenarios (between ChipPlusSign and Chip). Red dashed line at 'no difference'. Blue

1004 dashed line is the bisector.

1005

1006

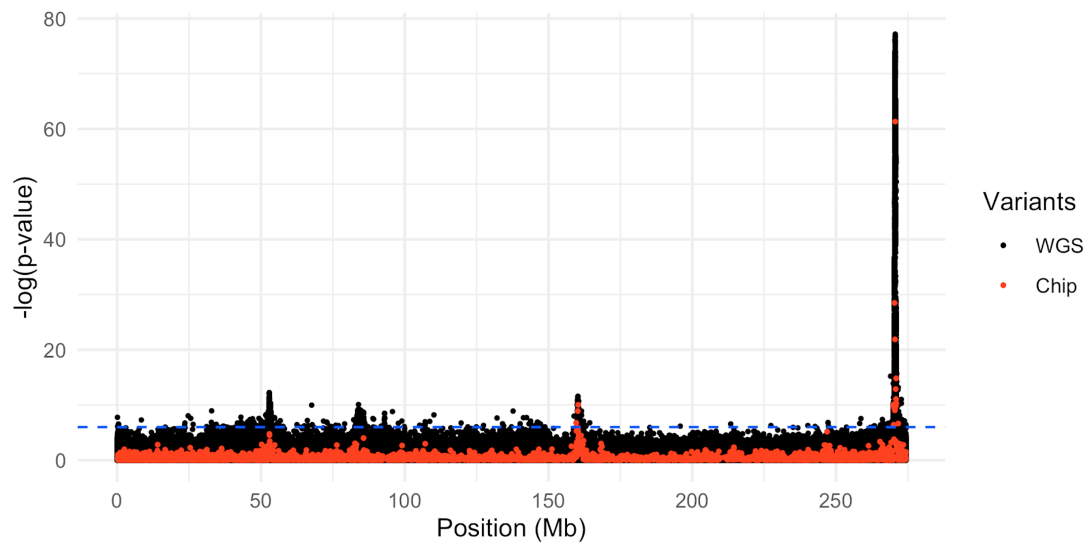

1007

1008 **Figure 8.** Genome-wide association study results for trait BFT in line A. Only

1009 chromosome 1 is displayed as an example. In red, results for the variants in the

1010 marker array (Chip); in black, results for the whole-genome sequence data (WGS).

1011 The blue dashed line indicates significance threshold with Bonferroni's multiple test

1012 correction assuming that the markers from the marker arrays were independent (p-

1013 value  $\leq 10^{-6}$ ).

1014

## Tables

1015 **Table 1.** Number of sequenced pigs and pigs with imputed data.

| Line | Individuals sequenced | Individuals sequenced by coverage |     |    |        | Individuals used in analyses |         |
|------|-----------------------|-----------------------------------|-----|----|--------|------------------------------|---------|
|      |                       | 1x                                | 2x  | 5x | 15–30x | Pedigree                     | Imputed |
| A    | 1,856                 | 1,044                             | 649 | 73 | 90     | 122,753                      | 104,661 |
| B    | 1,366                 | 685                               | 545 | 44 | 92     | 88,964                       | 76,230  |
| C    | 1,491                 | 628                               | 728 | 54 | 81     | 84,420                       | 66,608  |
| D    | 731                   | 362                               | 311 | 16 | 42     | 79,981                       | 60,474  |
| E    | 760                   | 394                               | 274 | 27 | 65     | 50,797                       | 41,573  |
| F    | 381                   | 193                               | 137 | 16 | 35     | 35,309                       | 29,330  |
| G    | 445                   | 217                               | 176 | 15 | 37     | 21,129                       | 17,224  |

1016

1017 **Table 2.** Number of phenotypic records per trait and line.

| <b>Trait</b> | <b>A</b> | <b>B</b> | <b>C</b> | <b>D</b> | <b>E</b> | <b>F</b> | <b>G</b> |
|--------------|----------|----------|----------|----------|----------|----------|----------|
| ADG          | 88,342   | 64,285   | 56,173   | 51,061   | 35,423   | 26,335   | 15,452   |
| BFT          | 80,146   | 62,027   | 55,233   | 47,509   | 34,527   | 23,872   | 15,268   |
| LD           | 85,233   | 64,141   | 56,026   | 48,509   | 35,495   | 26,453   | 15,274   |
| ADFI         | 21,960   | 9,525    | 9,062    | 12,256   | 12,444   | 4,105*   | 4,851    |
| FCR          | 21,200   | 9,217    | 8,654    | 12,044   | 12,316   | 4,016*   | 4,754    |
| TNB          | 13,581   | 10,721   | 9,626    | 7,729*   | 6,506*   | -        | 3,230*   |
| LWW          | -        | 9,112    | 7,251    | -        | -        | -        | 2,813*   |
| RET          | -        | 6,978    | 6,327    | -        | -        | -        | 1,669*   |
| Simulated    | 104,661  | 76,230   | 66,608   | 60,474   | 41,573   | 29,330   | 17,224   |

1018 *ADG* average daily gain, *BFT* backfat thickness, *LD* loin depth, *ADFI* average daily

1019 feed intake, *FCR* feed conversion ratio, *TNB* total number of piglets born, *LWW* litter

1020 weight at weaning, *RET* return to oestrus 7 days after weaning.

1021 \*Included in multi-line scenarios, but excluded in within-line scenarios because of the

1022 limited size of the testing set.

1023



1024 **Table 3.** Number of significant variants from the whole-genome sequence data that  
1025 were added to the marker array in ChipPlusSign.

| <b>Trait</b> | <b>A</b> | <b>B</b> | <b>C</b> | <b>D</b> | <b>E</b> | <b>F</b> | <b>G</b> | <b>Multi-line</b> |
|--------------|----------|----------|----------|----------|----------|----------|----------|-------------------|
| ADG          | 646      | 581      | 424      | 498      | 279      | 219      | 143      | 4731              |
| BFT          | 1083     | 758      | 664      | 518      | 1030     | 218      | 237      | 6149              |
| LD           | 633      | 579      | 458      | 518      | 222      | 215      | 43       | 7247              |
| ADFI         | 145      | 224      | 169      | 23       | 183      | -        | 119      | 767               |
| FCR          | 198      | 224      | 162      | 95       | 56       | -        | 134      | 1369              |
| TNB          | 71       | 117      | 161      | -        | -        | -        | -        | 248               |
| LWW          | -        | 32       | 73       | -        | -        | -        | -        | 480               |
| RET          | -        | 184      | 31       | -        | -        | -        | -        | 60                |

1026 *ADG* average daily gain, *BFT* backfat thickness, *LD* loin depth, *ADFI* average daily  
1027 feed intake, *FCR* feed conversion ratio, *TNB* total number of piglets born, *LWW* litter  
1028 weight at weaning, *RET* return to oestrus 7 days after weaning.

1029

1030 **Table 4.** Number of significantly associated genomic regions in the genome-wide  
 1031 association study for the simulated phenotypes that contained 0, 1 or 2 or more  
 1032 quantitative trait nucleotides (QTN).

| $h^2$ | nQTN | Line size | Chip  |       | Whole-genome sequence |       |              |
|-------|------|-----------|-------|-------|-----------------------|-------|--------------|
|       |      |           | 0 QTN | 1 QTN | 0 QTN                 | 1 QTN | $\geq 2$ QTN |
| 0.10  | 100  | 27k       | 4     | 1     | 8                     | 6     | 0            |
|       |      | 56k       | 11    | 3     | 19                    | 19    | 0            |
|       |      | 92k       | 10    | 7     | 44                    | 19    | 0            |
|       | 1k   | 27k       | 1     | 0     | 4                     | 0     | 1            |
|       |      | 56k       | 1     | 0     | 16                    | 3     | 1            |
|       |      | 92k       | 1     | 0     | 283                   | 9     | 0            |
|       | 10k  | 27k       | 1     | 0     | 1                     | 0     | 0            |
|       |      | 56k       | 0     | 0     | 16                    | 2     | 1            |
|       |      | 92k       | 2     | 0     | 186                   | 17    | 12           |
| 0.25  | 100  | 27k       | 11    | 6     | 26                    | 15    | 1            |
|       |      | 56k       | 22    | 8     | 44                    | 28    | 3            |
|       |      | 92k       | 20    | 7     | 90                    | 34    | 1            |
|       | 1k   | 27k       | 0     | 0     | 8                     | 1     | 3            |
|       |      | 56k       | 3     | 0     | 34                    | 15    | 6            |
|       |      | 92k       | 6     | 0     | 692                   | 49    | 16           |
|       | 10k  | 27k       | 0     | 0     | 2                     | 0     | 0            |
|       |      | 56k       | 0     | 0     | 90                    | 9     | 22           |
|       |      | 92k       | 4     | 0     | 564                   | 56    | 164          |
| 0.50  | 100  | 27k       | 18    | 9     | 24                    | 24    | 1            |
|       |      | 56k       | 30    | 13    | 116                   | 41    | 3            |
|       |      | 92k       | 17    | 9     | 425                   | 44    | 1            |
|       | 1k   | 27k       | 6     | 0     | 22                    | 9     | 6            |
|       |      | 56k       | 5     | 1     | 238                   | 59    | 32           |
|       |      | 92k       | 11    | 1     | 903                   | 169   | 120          |
|       | 10k  | 27k       | 0     | 0     | 4                     | 0     | 0            |
|       |      | 56k       | 0     | 0     | 360                   | 77    | 172          |
|       |      | 92k       | 10    | 0     | 379                   | 116   | 508          |

1033
