1 **Genomic prediction with whole-genome**  
2 **sequence data in intensely selected pig lines**

3

4 Roger Ros-Freixedes<sup>1,2§</sup>, Martin Johnsson<sup>1,3</sup>, Andrew Whalen<sup>1</sup>, Ching-Yi Chen<sup>4</sup>,  
5 Bruno D Valente<sup>4</sup>, William O Herring<sup>4</sup>, Gregor Gorjanc<sup>1</sup>, John M Hickey<sup>1</sup>

6

7 <sup>1</sup> The Roslin Institute and Royal (Dick) School of Veterinary Studies, The University  
8 of Edinburgh, Easter Bush, Midlothian, Scotland, UK

9 <sup>2</sup> Departament de Ciència Animal, Universitat de Lleida - Agrotecnio-CERCA Center,  
10 Lleida, Spain.

11 <sup>3</sup> Department of Animal Breeding and Genetics, Swedish University of Agricultural  
12 Sciences, Uppsala, Sweden.

13 <sup>4</sup> The Pig Improvement Company, Genus plc, Hendersonville, TN, USA.

14 §Corresponding author: RRF [roger.ros@roslin.ed.ac.uk](mailto:roger.ros@roslin.ed.ac.uk)

15

## **Abstract**

### **Background**

16 Early simulations indicated that whole-genome sequence data (WGS) could improve  
17 genomic prediction accuracy and its persistence across generations and breeds.  
18 However, empirical results have been ambiguous so far. Large data sets that capture  
19 most of the genome diversity in a population must be assembled so that allele  
20 substitution effects are estimated with high accuracy. The objectives of this study  
21 were to use a large pig dataset to assess the benefits of using WGS for genomic  
22 prediction compared to using commercial marker arrays, to identify scenarios in  
23 which WGS provides the largest advantage, and to identify potential pitfalls for its  
24 effective implementation.

### **Methods**

25 We sequenced 6,931 individuals from seven commercial pig lines with different  
26 numerical size. Genotypes of 32.8 million variants were imputed for 396,100  
27 individuals (17,224 to 104,661 per line). We used BayesR to perform genomic  
28 prediction for eight complex traits. Genomic predictions were performed using either  
29 data from a marker array or variants preselected from WGS based on association tests.

### **Results**

30 The prediction accuracy with each set of preselected WGS variants was not robust  
31 across traits and lines and the improvements in prediction accuracy that we achieved  
32 so far with WGS compared to marker arrays were generally small. The most  
33 favourable results for WGS were obtained when the largest training sets were  
34 available and used to preselect variants with statistically significant associations to the  
35 trait for augmenting the established marker array. With this method and training sets

36 of around 80k individuals, average improvements of genomic prediction accuracy of  
37 0.025 were observed in within-line scenarios.

### **Conclusions**

38 Our results showed that WGS has a small potential to improve genomic prediction  
39 accuracy compared to marker arrays in intensely selected pig lines in some settings.  
40 Thus, although we expect that more robust improvements could be attained with a  
41 combination of larger training sets and optimised pipelines, the use of WGS in the  
42 current implementations of genomic prediction should be carefully evaluated on a  
43 case-by-case basis against the cost of generating WGS at a large scale.

44

## Introduction

45           Whole-genome sequence data (WGS) has the potential to empower the  
46 identification of causal variants that underlie quantitative traits or diseases [1–4],  
47 increase the precision and scope of population genetic studies [5,6], and enhance  
48 livestock breeding. Genomic prediction has been successfully implemented in the  
49 main livestock species and it has increased the rate of genetic gain [7]. Genomic  
50 prediction has provided many benefits such as greater accuracies of genetic  
51 evaluations in livestock populations, such as cattle and pig, and the reduction of the  
52 generational interval, most notably in dairy cattle. Since its early implementations,  
53 genomic prediction is typically performed using marker arrays that capture the effects  
54 of the (usually unknown) causal variants via linkage and linkage disequilibrium [8,9].  
55 In contrast, WGS are assumed to contain the causal variants. For this reason, it was  
56 hypothesized that WGS could further improve genomic prediction accuracy and its  
57 persistence across generations and breeds. Early simulations indicated that causal  
58 mutations from WGS could increase prediction accuracy. One simulation study  
59 indicated that the magnitude of prediction accuracy improvement relative to dense  
60 marker arrays ranged from 2.5 to 3.7%, with a persistence of over 10 generations [10].  
61 Another study reported improvements in prediction accuracy of up to 30% if causal  
62 variants with low minor allele frequency could be captured by the WGS [11].  
63 However, benefits could be low in typical livestock populations due to small effective  
64 population sizes and recent directional selection [12].

65           During the last few years, there have been several attempts at improving the  
66 accuracy of genomic prediction with WGS in the main livestock species. Empirical  
67 results have been ambiguous so far. When predicting genomic breeding values within  
68 a population, some studies found no relevant improvement in genomic prediction

69 accuracy with WGS compared to marker arrays [13–16]. Other studies found small,  
70 and often unstable, improvements (e.g., from 1 to 5% or no improvement depending  
71 on prediction method [17–19], or trait-dependent results [19,20]). With genomic  
72 prediction across populations, the identification of causal variants from WGS can  
73 improve prediction accuracy [21–24], especially for numerically small populations or  
74 for populations that are not represented in the training [21,23–27].

75         One of the most successful strategies to exploit WGS consists in augmenting  
76 available marker arrays with preselected variants from WGS based on their  
77 association with the trait of interest [28–31]. In some cases, this strategy improved  
78 genomic prediction accuracy by up to 9% [30] and 11% [31], but this strategy did not  
79 improve prediction accuracy in other within-line settings [15]. Nevertheless, these  
80 examples indicate how identifying causal variants could enhance genomic prediction  
81 with WGS. Whole-genome sequence data has already been applied in genome-wide  
82 association studies (GWAS) to identify variants associated to a variety of traits in  
83 livestock [2,32–34], including pigs [35,36]. However, the fine-mapping of causal  
84 variants remains challenging due to the pervasive long-range linkage disequilibrium  
85 across extremely dense variation [37].

86         The estimation of allele substitution effects with high accuracy and, ideally,  
87 the identification of causal variants amongst millions of other variants are important  
88 for the usefulness of WGS in research and breeding. This requires large data sets able  
89 to capture most of the genome diversity in a population. Low-cost sequencing  
90 strategies have been developed, which typically involve sequencing a subset of the  
91 individuals in a population at low coverage and then imputing WGS for the remaining  
92 individuals. However, despite this, the cost of generating accurate WGS at such a  
93 large scale, as well as the large computational requirements for the analyses of such

94 datasets, have limited the population sizes or number of populations tested in some of  
95 the previous studies. This hinders the interpretation of results across studies, which  
96 are very diverse in population structures, sequencing strategies and prediction  
97 methodologies used. The largest studies in livestock on the use of WGS for genomic  
98 prediction to date have been performed in cattle, for which a large multi-breed  
99 reference panel is available from the 1000 Bull Genomes Project [2,17,32]. This  
100 reference panel has enabled the imputation of WGS in many cattle populations. The  
101 lack of such reference panels hampers the potential of WGS in other species, such as  
102 pigs [35].

103 We have previously described our approach to impute WGS in large pedigreed  
104 populations without external reference panels [38]. Following that strategy, we  
105 generated WGS for 396,100 pigs from seven intensely selected lines with diverse  
106 genetic backgrounds and numerical size. The objectives of this study were to use this  
107 large pig dataset to assess the benefits of using WGS for genomic prediction  
108 compared to using commercial marker arrays, to identify scenarios in which WGS  
109 provides the largest advantage, and to identify potential pitfalls for its effective  
110 implementation.

111

## **Materials and Methods**

### **Populations and sequencing strategy**

112 We re-sequenced the whole genome of 6,931 individuals from seven  
113 commercial pig lines (Genus PIC, Hendersonville, TN) with a total coverage of  
114 approximately 27,243x. Breeds of origin of the nine lines included Large White,  
115 Landrace, Pietrain, Hampshire, Duroc, and synthetic lines. Sequencing effort in each  
116 of the seven lines was proportional to population size. The number of pigs that were

117 available in the pedigree of each line and the number of sequenced pigs, by coverage,  
118 is summarized in Table 1. Approximately 1.5% (0.9 to 2.1% in each line) of the pigs  
119 in each line were sequenced. Most pigs were sequenced at low coverage, with target  
120 coverage of 1 or 2x, but a subset of pigs was sequenced at a higher coverage of 5, 15,  
121 or 30x. Thus, the average individual coverage was 3.9x, but the median coverage was  
122 1.5x. Most of the sequenced pigs were born during the 2008–2016 period. The  
123 population structure across the seven lines was assessed with a principal component  
124 analysis using the sequenced pigs and is shown in Additional file 1.

125         The sequenced pigs and their coverage were selected following a three-part  
126 sequencing strategy developed to represent the haplotype diversity in each line. First  
127 (1), sires and dams with the highest number of genotyped progeny were sequenced at  
128 2x and 1x, respectively. Sires were sequenced at a greater coverage because they  
129 contributed with more progeny than dams. Then (2), the individuals with the greatest  
130 genetic footprint on the population (i.e., those that carry more of the most common  
131 haplotypes) and their immediate ancestors were sequenced at a coverage between 1x  
132 and 30x (AlphaSeqOpt part 1; [39]). The sequencing coverage was allocated with an  
133 algorithm that maximises the expected phasing accuracy of the common haplotypes  
134 from the accumulated family information. Finally (3), pigs that carried haplotypes  
135 with low accumulated coverage (below 10x) were sequenced at 1x (AlphaSeqOpt part  
136 2; [40]). Sets (2) and (3) were based on haplotypes inferred from marker array  
137 genotypes (GGP-Porcine HD BeadChip; GeneSeek, Lincoln, NE), which were phased  
138 with AlphaPhase [41] and imputed with AlphaImpute [42].

139         Most sequenced pigs and their relatives were also genotyped with marker  
140 arrays either at low density (15k markers) using the GGP-Porcine LD BeadChip  
141 (GeneSeek) or at high density (50k or 80k markers) using different versions of the

142 GGP-Porcine HD BeadChip (GeneSeek). In our study we only used markers included  
143 in the 50k array, which is the latest version of the high-density array. Markers in the  
144 15k array were nested within the 50k array and markers from the 80k array that were  
145 not included in the 50k array were discarded. The number of pigs genotyped at each  
146 density is summarized in Table 1. Quality control of the marker array data was based  
147 on the individuals genotyped at high density. Markers with minor allele frequency  
148 below 0.01, call rate below 0.80, or a significant deviation from the Hardy-Weinberg  
149 equilibrium were removed. After quality control, 38,634 to 43,966 markers remained  
150 in each line.

151

### **Sequencing and data processing**

152 Tissue samples were collected from ear punches or tail clippings. Genomic  
153 DNA was extracted using Qiagen DNeasy 96 Blood & Tissue kits (Qiagen Ltd.,  
154 Mississauga, ON, Canada). Paired-end library preparation was conducted using the  
155 TruSeq DNA PCR-free protocol (Illumina, San Diego, CA). Libraries for  
156 resequencing at low coverage (1 to 5x) were produced with an average insert size of  
157 350 bp and sequenced on a HiSeq 4000 instrument (Illumina). Libraries for  
158 resequencing at high coverage (15 or 30x) were produced with an average insert size  
159 of 550 bp and sequenced on a HiSeq X instrument (Illumina). All libraries were  
160 sequenced at Edinburgh Genomics (Edinburgh Genomics, University of Edinburgh,  
161 Edinburgh, UK).

162 DNA sequence reads were pre-processed using Trimmomatic [43] to remove  
163 adapter sequences from the reads. The reads were then aligned to the reference  
164 genome *Sscrofa11.1* (GenBank accession: GCA\_000003025.6) using the BWA-MEM  
165 algorithm [44]. Duplicates were marked with Picard



166 (<http://broadinstitute.github.io/picard>). Single nucleotide polymorphisms (SNPs) and  
167 short insertions and deletions (indels) were identified with the variant caller GATK  
168 HaplotypeCaller (GATK 3.8.0) [45,46] using default settings. Variant discovery with  
169 GATK HaplotypeCaller was performed separately for each individual and then a joint  
170 variant set for all the individuals in each population was obtained by extracting the  
171 variant positions from all the individuals.

172         We extracted the read counts supporting each allele directly from the aligned  
173 reads stored in the BAM files using a pile-up function to avoid biases towards the  
174 reference allele introduced by GATK when applied on low-coverage WGS [47]. That  
175 pipeline uses pysam (version 0.13.0; <https://github.com/pysam-developers/pysam>),  
176 which is a wrapper around htslib and the samtools package [48]. We extracted the  
177 read counts for all biallelic variants, after filtering out variants observed in less than  
178 three sequenced individuals and variants in potential repetitive regions (defined as  
179 variants that had mean depth values 3 times greater than the average realized  
180 coverage) with VCFtools [49]. This pipeline delivered a total of 55.6 million SNP  
181 (19.6 to 31.1 million within each line) and 10.2 million indels (4.1 to 5.6 million  
182 within each line). A more complete description of the variation across the lines is  
183 provided in [50].

184

### **Genotype imputation**

185         Genotypes were jointly called, phased and imputed for a total of 483,353  
186 pedigree-related individuals using the ‘hybrid peeling’ method implemented in  
187 AlphaPeel [51,52]. This method used all the available marker array and WGS.  
188 Imputation was performed separately for each line using complete multi-generational  
189 pedigrees, with 21,129 to 122,753 individuals per line (Table 1). We have previously

190 published reports on the accuracy of imputation in the same populations using this  
191 method [38]. The estimated average individual-wise dosage correlation was 0.94  
192 (median: 0.97). Individuals with low predicted imputation accuracy were removed  
193 before further analyses. An individual was predicted to have low imputation accuracy  
194 if itself or all of its grandparents were not genotyped with a marker array or if it had a  
195 low degree of connectedness to the rest of the population (defined as the sum of  
196 coefficients of pedigree-based relationship between the individual and the rest of  
197 individuals). These criteria were based on the analysis of imputation accuracy in  
198 simulated and empirical data [38]. A total of 396,100 individuals remained, with  
199 17,224 and 104,661 individuals per line (Table 1). The expected average individual-  
200 wise dosage correlation of the remaining individuals was 0.97 (median: 0.98)  
201 according to our previous estimates. We also excluded from the analyses variants with  
202 a minor allele frequency lower than 0.023, because their estimated variant-wise  
203 dosage correlations was lower than 0.90 [38]. After imputation, 32.8 million variants  
204 (14.5 to 19.9 million within each line) remained for downstream analyses, out of  
205 which 9.9 million segregated across all seven lines.

206

## Traits

207 We analysed data of eight complex traits that are commonly included in  
208 selection objectives of pig breeding programmes: average daily gain (ADG, g),  
209 backfat thickness (BFT, mm), loin depth (LD, mm), average daily feed intake (ADFI,  
210 kg), feed conversion ratio (FCR), total number of piglets born (TNB), litter weight at  
211 weaning (LWW, kg), and return to oestrus 7 days after weaning (RET, binary trait).  
212 Most pigs with records were born during the 2008–2020 period. Breeding values were  
213 estimated by line with a linear mixed model that included polygenic and non-genetic

214 (as relevant for each trait) effects. Deregressed breeding values (dEBV) were obtained  
215 following the method of VanRaden et al. [53]. Only individuals in which the trait was  
216 directly measured were retained for further analyses. The number of records for each  
217 trait used in the analyses of each line is detailed in Table 2.

218

### **Training and testing sets**

219 We split the individuals in each line into training and testing sets. The testing  
220 sets were defined as individuals from full-sib families from the last generation of the  
221 pedigree (i.e., individuals that did not have any progeny of their own). Only families  
222 with a minimum of 5 full-sibs were considered. The training set was defined as all  
223 those individuals that had a pedigree coefficient of relationship lower than 0.5 with  
224 any individual in the testing set. This design was chosen to mimic a realistic situation  
225 in which breeding programmes evaluate selection candidates available in a selection  
226 nucleus at any given time.

227 To assess the effect of the size of the training set on prediction accuracy, we  
228 created training sets with a reduced number of phenotype records for the three largest  
229 lines and the three traits with the largest number of records. We did this by removing  
230 the oldest animals in a way that approximately the most recent 10, 20, or 35 to 45  
231 thousand phenotype records remained in each of the reduced training sets.

232 Due to the computational requirements of the analyses, we could not perform  
233 repetitions for every analysis. However, we estimated variability of the results across  
234 repetitions in the largest, an intermediate, and the smallest lines for two traits with a  
235 large and small number of phenotype records. For doing this, we randomly split the  
236 test sets into five subsets, with each full-sib family represented exclusively in one of  
237 the subsets. Training sets for each repetition were defined as for the general case.

238

### Genome-wide association study

239 To provide an association-based criterion to preselect variants for genomic  
240 prediction, we performed a GWAS for each trait and line. This step included only the  
241 individuals in the training set. We fitted a univariate linear mixed model that  
242 accounted for the genomic relationships as:

$$243 \quad \mathbf{y} = \mathbf{x}_i \beta_i + \mathbf{u} + \mathbf{e},$$

244 where  $\mathbf{y}$  is the vector of dEBV,  $\mathbf{x}_i$  is the vector of genotypes for the  $i$ th variant coded  
245 as 0 and 2 if homozygous for either allele or 1 if heterozygous,  $\beta_i$  is the allele  
246 substitution effect of the  $i$ th variant on the trait,  $\mathbf{u} \sim N(0, \sigma_u^2 \mathbf{K})$  is the vector of  
247 polygenic effects with the covariance matrix equal to the product of the polygenic  
248 additive genetic variance  $\sigma_u^2$  and a genomic relationship matrix  $\mathbf{K}$ , and  $\mathbf{e}$  is a vector of  
249 uncorrelated residuals. Due to computational limitations, the genomic relationship  
250 matrix  $\mathbf{K}$  was calculated using only imputed genotypes in the marker array. We used  
251 the FastLMM software [54,55] to fit the model.

252

### Within-line genomic prediction

253 To test whether variants from the WGS could provide greater genomic  
254 prediction accuracy than the marker array, we tested genomic prediction using  
255 variants from the marker array, from the WGS, or combining them. The marker array  
256 data (also referred to as ‘Chip’) was set as the benchmark for prediction accuracy. It  
257 contained all ~40k variants in the marker array. For WGS, we preselected sets of  
258 variants because currently available methods for genomic prediction are not yet  
259 capable of handling datasets as large as the complete WGS without exorbitant

260 computational resources. We tested different alternative strategies for preselecting  
261 variants for the prediction model based on the GWAS results:

- 262 • *Top40k*. To mimic the number of variants in Chip, we preselected the variants  
263 with the lowest p-value (not necessarily below the significance threshold) in each  
264 of consecutive non-overlapping 55-kb windows along the genome. In addition, to  
265 test the impact of variant density on prediction accuracy, we preselected 10k,  
266 25k, 75k, or 100k variants following the same criterion.
- 267 • *ChipPlusSign*. Variants preselected as in Top40k, but only significant variants  
268 ( $p \leq 10^{-6}$ ) were preselected and merged with those in Chip. When a 55-kb window  
269 contained more than one significant variant, only that with the lowest p-value was  
270 selected as a proxy to reduce the preselection of multiple significant variants  
271 tagging the same causal variant. When the most significant variant from WGS  
272 was already included in the marker array, the variant was considered only once  
273 and in the rare cases of genotype discordance, the genotype was replaced with the  
274 mean genotype value in that line. On average, 309 significant variants were  
275 identified per trait and line (range: 23 to 1083; Table 3) and merged with those in  
276 Chip.

277

278 Genomic prediction was performed by fitting a univariate model with BayesR  
279 [56,57], which uses a mixture of normal distributions as the prior for variant effects,  
280 including one distribution that sets the variant effects to zero. The model was:

$$281 \quad \mathbf{y} = \mathbf{1}\mu + \mathbf{X}\boldsymbol{\beta} + \mathbf{e},$$

282 where  $\mathbf{y}$  is the vector of dEBV,  $\mathbf{1}$  is a vector of ones,  $\mu$  is the general mean,  $\mathbf{X}$  is a  
283 matrix of variant genotypes,  $\boldsymbol{\beta}$  is a vector of variant effects, and  $\mathbf{e}$  is a vector of  
284 uncorrelated residuals. The prior variance of the variant effects in  $\boldsymbol{\beta}$  had four

285 components with mean zero and variances  $\sigma_1^2 = 0$ ,  $\sigma_2^2 = 0.0001\sigma_g^2$ ,  $\sigma_3^2 = 0.001\sigma_g^2$ ,  
286 and  $\sigma_4^2 = 0.01\sigma_g^2$ , where  $\sigma_g^2$  is the total genetic variance. We used a uniform and  
287 almost uninformative prior for the mixture distribution with the total genetic variance  
288 re-estimated in every iteration. We used a publicly available implementation of  
289 BayesR (<https://github.com/syntheke/bayesR>; accessed on 30 April 2021), with  
290 default settings. Prediction accuracy was calculated in the testing set as the correlation  
291 between the predicted genomic breeding values and the dEBV. Bias of the prediction  
292 accuracy was calculated as the regression coefficient of the dEBV on the predicted  
293 genomic breeding values. For ease of comparison between traits and lines, the  
294 difference between prediction accuracy of WGS and the marker array was calculated.  
295 The difference in prediction accuracy was analysed by fitting linear models with the  
296 size of the training set as a covariate and trait and line as fixed effects when  
297 appropriate.

298

### **Multi-line genomic prediction**

299 We considered multi-line scenarios in which the training set was formed by  
300 merging the training sets that had been defined for each line. All analyses were  
301 performed as for the within-line scenarios but with an additional effect of the line in  
302 the prediction model. In the multi-line scenarios, all variants from the marker array  
303 that passed quality control and were imputed for at least one line were included in the  
304 baseline (referred to as ‘ML-Chip’). For ease of computation, the strategies for  
305 preselection of variants from WGS were applied only to the subset of 9.9 million  
306 variants that had been called and imputed in all seven lines. Thus, we defined the  
307 variant sets ‘ML-Top40k’ and ‘ML-ChipPlusSign’ by preselecting variants following  
308 the same criteria as in within-line scenarios, but using a multi-line GWAS with an

309 additional effect of the line. For ML-ChipPlusSign, 60 to 7247 significant variants  
310 were identified per trait (Table 3) and merged with those in ML-Chip. For comparison  
311 purposes, genomic prediction accuracy was calculated for the testing set of each  
312 individual line.

313

## Results

### Within-line genomic prediction accuracy

314 Whole-genome sequence data improved genomic prediction accuracy  
315 compared to marker array data in some scenarios, especially when there was a  
316 sufficiently large training set and if an appropriate set of variants was preselected.  
317 Figure 1 shows the prediction accuracy for the three traits and three lines with the  
318 largest training sets using the two different sets of WGS variants. Results for the rest  
319 of traits and lines, as well as results for the bias, are provided in Additional File 2. For  
320 BFT in line B, the two tested sets of variants from the WGS increased prediction  
321 accuracy by 0.054 (+9.8%), for Top40k, and by 0.043 (+7.7%), for ChipPlusSign.  
322 However, the performance of WGS was not robust and differed for each trait and line,  
323 and even across repetitions within trait and line (Additional File 3), often leading to  
324 no improvements of prediction accuracy or even reduced prediction accuracy relative  
325 to the marker array. For instance, Top40k reduced prediction accuracy by 0.020 (–  
326 3.4%), for ADG in line C, and ChipPlusSign by 0.020 (–2.2%), for LD in line C.  
327 Using WGS reduced bias compared to the marker array in some, but not all,  
328 scenarios.

329 There was a trend that the capacity of WGS variants to improve the genomic  
330 prediction accuracy compared to the marker arrays was larger for the traits and lines  
331 with larger training sets. Figures 2 and 3 show the difference in prediction accuracy of

332 Top40k and ChipPlusSign compared to the marker array against the training set size.  
333 We observed large variability for the difference in prediction accuracy, especially  
334 when the training set was small. This variability was larger in Top40k than in  
335 ChipPlusSign, in a way that shrinkage of variation as the training set was larger was  
336 more noticeable in ChipPlusSign. Within trait and line, the variability across  
337 repetitions was also larger in Top40k than in ChipPlusSign (Additional File 3). Gains  
338 in prediction accuracy were low-to-moderate in the most favourable cases. In the most  
339 unfavourable cases we observed large losses in prediction accuracy for Top40k but  
340 more limited losses for ChipPlusSign with moderate training set sizes. The regression  
341 coefficient between the difference in prediction accuracy and the size of the training  
342 set was positive but had stronger statistical evidence for ChipPlusSign ( $b=0.5 \cdot 10^{-6}$   
343  $\text{individual}^{-1}$ ;  $p=0.032$ ;  $R^2$  for each trait between 0.06 and 0.75) than for Top40k  
344 ( $b=0.5 \cdot 10^{-6}$   $\text{individual}^{-1}$ ;  $p=0.24$ ;  $R^2$  for each trait between 0.00 and 0.20), because of  
345 the apparent lower robustness with Top40k.

346 Results within trait and line (Figure 4) confirmed that the impact of WGS on  
347 genomic prediction accuracy depended on line, but also that in general WGS yielded  
348 higher prediction accuracy compared to the marker array when the training set was  
349 the largest. Under this setting, the regression coefficient between the difference in  
350 prediction accuracy and the size of training set was  $0.6 \cdot 10^{-6}$   $\text{individual}^{-1}$  ( $p<0.001$ ), for  
351 Top40k, and  $0.3 \cdot 10^{-6}$   $\text{individual}^{-1}$  ( $p=0.017$ ) for ChipPlusSign. This was at least partly  
352 driven by the lower number of significant associations that were detected with smaller  
353 training sets. With a training set of 20k individuals or less, 118 to 287 significant  
354 variants were added to the marker array; with a training set of 35k to 45k individuals,  
355 288 to 709 significant variants; and with all available individuals in the training set,  
356 424 to 1083 significant variants. Thus, if the marker array was augmented with the



357 significant variants detected with all available individuals (ChipPlusSign\*), then  
358 WGS yielded the same prediction accuracy than the marker array or higher in most  
359 scenarios even when the set for training the predictive equation was smaller.

360 Results from simulated traits (Additional File 4) confirmed the trends  
361 observed for the empirical traits; for instance, the higher robustness of ChipPlusSign  
362 compared to Top40k. Results from the simulated traits also showed the impact of the  
363 genetic architecture of the traits on the success of WGS in improving genomic  
364 prediction accuracy. Traits with high heritability and low number of QTN were more  
365 likely to show larger improvements in prediction accuracy.

366 We observed diminishing returns when we increased the density of the  
367 variants used in prediction. Increasing the number of variants from the 40k in Top40k  
368 to 75k selected in the same way yielded small improvements in genomic prediction  
369 accuracy compared to Top40k, but increases up to 100k variants provided smaller or  
370 null additional gains (Additional File 5).

371

### **Multi-line genomic prediction accuracy**

372 The accuracy of genomic prediction trained across multi-line datasets was  
373 systematically lower than in the within-line datasets (Additional File 6). Nonetheless,  
374 when using multi-line training sets, the ML-ChipPlusSign variants in general  
375 increased genomic prediction accuracy relative to the marker array (ML-Chip; Figure  
376 5). For the traits that accumulated the largest multi-line training sets (i.e., ADG, BFT,  
377 and LD), the improvements of prediction accuracy in each individual line seemed  
378 unrelated to the number of individuals that each line contributed to the multi-line  
379 training set. However, for the traits that accumulated smaller multi-line training sets  
380 (i.e., ADFI and FCR), ML-ChipPlusSign only improved prediction accuracy in the

381 lines that contributed more individuals to the multi-line training set, and reduced  
382 prediction accuracy in the lines that contributed less individuals to the multi-line  
383 training set. Therefore, as happened in the within-line scenarios, the greatest  
384 improvements of prediction accuracy with WGS were achieved for the largest  
385 individual lines, although ML-ChipPlusSign in the multi-line scenarios also improved  
386 prediction accuracy compared to ML-Chip for some traits and lines for which no  
387 improvements were observed in the within-line scenarios, including numerically small  
388 lines (Figure 6). In contrast, results for ML-Top40k were not robust across traits  
389 (Additional File 7).

390

### **Preselection of variants through genome-wide association study**

391 Although GWAS with WGS has the potential to detect associations that are  
392 not captured by marker arrays, the fine-mapping of the associated regions and the  
393 preselection of variants through GWAS with WGS was limited due to the  
394 pervasiveness of linkage disequilibrium (Additional File 8) and was affected by false  
395 positives in a more severe way than GWAS with marker arrays, especially for highly  
396 polygenic traits (Additional File 4).

397

### **Discussion**

398 Our results showed that WGS has some potential to improve genomic  
399 prediction accuracy compared to marker arrays in intensely selected pig lines, but the  
400 use of WGS in current implementations should be carefully evaluated. On one hand,  
401 the small and non-robust improvements indicated that the strategies that we tested  
402 were likely suboptimal. On the other hand, the positive trend for the largest training  
403 sets indicated that we might have not reached the critical mass of data that is needed

404 to leverage the potential of WGS, especially in scenarios where genomic prediction  
405 with marker arrays is already yielding high accuracy. The results from several traits  
406 and lines with different training set sizes allowed us to identify the most favourable  
407 scenarios for genomic prediction with WGS. We will discuss (1) the prediction  
408 accuracy that we achieved with WGS compared to commercial marker array data and  
409 the scenarios in which WGS may become beneficial, (2) the potential pitfalls for its  
410 effective implementation and the need for an optimised strategy, and (3) the  
411 suitability of WGS for genomic prediction.

412

### **Prediction accuracy with whole-genome sequence data**

413 We compared the genomic prediction accuracy of the current marker array  
414 (Chip) with sets of preselected WGS variants in a way that the number of variants  
415 remained similar across sets. Improvements in prediction accuracy can be limited if  
416 current marker arrays are already sufficiently dense to capture a large proportion of  
417 the genetic diversity in intensely selected livestock populations. These populations  
418 typically have small effective population size due to intense selective breeding  
419 [12,17]. Nevertheless, modest improvements have been achieved under certain  
420 scenarios across several studies. In our study, the most robust results were obtained  
421 with the ChipPlusSign variant sets, where the marker array was augmented with WGS  
422 variants that had statistically significant associations to the trait. This is consistent  
423 with previous reports that showed an improvement in prediction accuracy under  
424 similar approaches [28–31]. We augmented the marker array with 23 to 1083  
425 significant variants in different scenarios. In the most successful scenarios, a  
426 minimum of around 200 significant variants were added and prediction accuracy  
427 improved by 0.025 on average with training sets of around 80k individuals. Other

428 studies suggested additions of a larger number of variants. In Nordic cattle, adding  
429 1623 variants (preselected as the combination of 3-5 variants for each of the top QTL  
430 per trait and breed) to a 50k marker array increased reliability (accuracy squared) by  
431 up to 0.05 [28], but a similar approach produced negligible improvements for low  
432 heritability traits [58]. In Holstein cattle, adding around 16k variants (preselected as  
433 the largest allele substitution effects) to a 60k marker array increased reliability on  
434 average by 0.027 (up to 0.048) [29]. In Hanwoo cattle, adding around 12k variants (3k  
435 for each of four traits) to a custom 50k marker array improved accuracy by up to  
436 ~0.06 [31]. In sheep, adding around 400 variants (preselected by GWAS with regional  
437 heritability mapping) to a 50k marker array increased accuracy by 0.09 [30].

438         The modest performance of ChipPlusSign and Top40k could also be a  
439 consequence of the difficulty for fine-mapping causal variants through GWAS on  
440 WGS. Theoretically, the identification of all causal variants associated with a trait  
441 should improve genomic prediction accuracy [59]. Even though WGS allows the  
442 detection of a very large number of associations, problems such as false positives or  
443 p-value inflation also become more severe, so that the added noise might offset the  
444 detected signal. For instance, results in cattle showed that GWAS on WGS did not  
445 detect clearer associated regions relative to marker arrays and failed to capture QTL  
446 for genomic prediction [13], because the effect of potential QTL were spread across  
447 multiple variants. Therefore, WGS performed better with simple genetic architectures  
448 (i.e., traits with a low number of QTN). This is consistent with expectations and  
449 simulation results [60] that indicated that the benefit of WGS for genomic prediction  
450 would be limited by the number and size of QTN. Therefore, for largely polygenic  
451 traits (as most traits of interest in livestock production), training sets need to be very  
452 large before WGS can increase genomic prediction accuracy [60].

453           The advantage of using WGS might be limited by the small effective  
454 population size of livestock populations under selection [61] and by the current  
455 training set sizes, especially in scenarios where marker arrays are already yielding  
456 high genomic prediction accuracy [13,18]. Multi-line training sets could be  
457 particularly beneficial with the use of WGS because they allow a larger training set  
458 with low pairwise relationship degree among individuals. Previous simulations  
459 suggested that WGS might be the most beneficial with multi-breed reference panels  
460 [62], especially for numerically small populations. Our results with a multi-line  
461 training set indicated that WGS can improve prediction accuracy in scenarios that are  
462 less optimised than within-line genomic prediction by up to 0.04. However, in general  
463 those predictions were still less accurate than in within-line scenarios. In our multi-  
464 line scenarios, we only used variation that segregated across all seven lines. We  
465 observed that population-specific variation accounted only for small fractions of  
466 genetic variance [50] and it seems unlikely that they would contribute much to  
467 genomic prediction accuracy across breeds. Another possible obstacle is the  
468 differences in the allele substitution effects of the causal mutations across breeds. This  
469 can be caused by differences in allele frequency, contributions of non-additive effects  
470 and different genetic backgrounds, or even gene-by-environment interactions among  
471 others [22,63].

472           We observed low robustness of genomic prediction with WGS across traits  
473 and lines, and drops in prediction accuracy in some scenarios. Regarding bias, it has  
474 been noted that using the same reference individuals for preselecting variants through  
475 GWAS and for training the predictive equation can reduce genomic prediction  
476 accuracy and bias the predicted genomic breeding values [15,64]. In complementary  
477 tests, we observed no systematic increase in accuracy or bias after splitting the

478 training set into two exclusive subsets, one for GWAS to preselect the predictor  
479 variants and the other for training the predictive equation (Additional File 9). One  
480 hypothesis is that both subsets belonged to the same population and therefore retained  
481 similar inter-relationships (i.e., they are not strictly independent sets of individuals).  
482 Moreover, the reduction in individuals available for training the predictors negatively  
483 affected genomic prediction accuracy.

484 We did not directly test persistence of genomic prediction accuracy across  
485 generations, but previous studies with empirical data found no higher persistence of  
486 prediction accuracy with WGS, not even with low degree of relationship between  
487 training and testing sets [13]. We expect such obstacles to persistence of accuracy  
488 until causal variants can be successfully identified and their non-additive effects are  
489 understood.

490

### **Suboptimal strategy and pitfalls**

491 The use of WGS for genomic prediction can only be reached after many other  
492 steps are completed to produce genotype data at the whole-genome level. Each of  
493 these steps has potential pitfalls to which the success of using WGS is sensitive. This  
494 strategy includes the choice of which individuals to sequence, the bioinformatics  
495 pipeline to call variants, the imputation of the WGS, and filtering of variants. When  
496 combined with the multiplicity of methods for preselecting variants for genomic  
497 prediction (which is unavoidable with current datasets, genomic prediction methods,  
498 and computational resources), there are many variables in the whole process that can  
499 affect the final result and that are not yet well understood. Therefore, a much greater  
500 effort for optimising such pipelines is required. Here we tested relatively simple  
501 approaches to evaluate how they performed with large WGS datasets. We have

502 discussed what in our opinion are the main pitfalls of our approach for selection of the  
503 individuals to sequence [52] and the biases that may appear during processing of  
504 sequencing reads [47] elsewhere. Here we will focus discussion on imputation of  
505 WGS and its use for genomic prediction.

506

### 507 *Imputation accuracy*

508 Imputation of WGS is particularly challenging because typically we must  
509 impute a very large number of variants for a very large number of individuals from  
510 few sequenced individuals. As a consequence, genotype uncertainty can be high  
511 [19,25,65,66]. The accuracy of the imputed WGS is one of the main factors that may  
512 limit its potential for genomic prediction. In a simulation study, van den Berg et al.  
513 [25] quantified the impact of imputation errors on genomic prediction accuracy and  
514 showed that prediction accuracy decreases as errors accumulate, especially in the  
515 testing set.

516 We assessed the imputation accuracy of our approach elsewhere [38,52] and  
517 recommended that ~2% of the population should be sequenced in intensely selected  
518 populations. In our study, line D was the line where genomic prediction accuracy with  
519 Top40k performed the worst, mostly performing worse than with the marker array. In  
520 this line, only 0.9% of the individuals in the population had been sequenced and  
521 therefore lower imputation accuracy could be expected. Although there was not  
522 enough evidence for establishing a link between these two features (sequencing effort  
523 and genomic prediction accuracy), we recommend cautious design of a sequencing  
524 strategy that is suited to the intended imputation method [52].

525 Genomic prediction accuracy could be improved by accounting for genotype  
526 uncertainty of the imputed WGS. For that, it could be advantageous to use allele

527 dosages rather than best-guess genotypes [66], although most current implementations  
528 of genomic prediction methods cannot handle such information.

529

### 530 *Preselection of predictor variants*

531 Using WGS to simply increase the number of variants does not improve  
532 genomic prediction accuracy [16,19,22]. Due to the large number of variants in WGS,  
533 there is a need to remove uninformative variants [22,30,62,65,67]. We can expect  
534 variants that are causal or at least informative about the causal variants, which  
535 depends on their distance to the causal variants, to be the most predictive [68]. For  
536 this reason, variants that are in weak linkage disequilibrium with causal mutations  
537 have a ‘dilution’ effect, i.e., they add noise and limit prediction accuracy [22,30,67].  
538 However, if too stringent filters are applied during preselection of predictor variants,  
539 there is a risk of removing true causal variants, and that would debilitate persistence  
540 of accuracy across generations and across populations [62,69]. For instance, the  
541 impact of removing variants with low minor allele frequency can vary depending on  
542 the minor allele frequency of the causal variants as well as the distance between  
543 preselected and causal variants [68]. Losing causal or informative variants would  
544 negatively affect multi-line or multi-breed prediction.

545 A popular strategy to preselect variants for the prediction model is based on  
546 association tests. Genome-wide association studies on WGS are expected to confirm  
547 associations that were already detected with marker arrays and identify novel  
548 associations (e.g., [35,70]). However, preliminary inspection of our empirical GWAS  
549 results showed that the added noise could easily offset the added information and  
550 fine-mapping remains challenging. Multi-breed GWAS [4] and meta-analyses [71] are  
551 suitable alternatives for GWAS to accommodate much larger population sizes and for



552 combining results of populations with diverse genetic backgrounds. Multi-breed  
553 GWAS can be more efficient to identify informative variants than single-breed  
554 GWAS, which may benefit even prediction within lines [72]. Because the signal of  
555 some variants may go undetected for some traits but not for other correlated traits,  
556 combining GWAS information of several traits can also help identifying weak or  
557 moderate associations [23]. We did not test whether combining the significant  
558 markers from the different single-trait GWAS yielded greater improvements in  
559 prediction accuracy [28,31]. Multi-trait GWAS could be more suited for that purpose  
560 [70,73]. To improve fine-mapping, other GWAS models that incorporate biological  
561 information have been proposed (e.g., functional annotation [74] or metabolomics  
562 [75]).

563 Other methods were suggested to improve variant preselection for genomic  
564 prediction. VanRaden et al. [29] suggested that preselecting variants based on the  
565 genetic variance that they contribute rather than the significance of the association  
566 could be more advantageous, because the former would indirectly preselect variants  
567 with higher minor allele frequency. Other authors proposed preselection of variants  
568 using others statistics, such as the fixation index ( $F_{ST}$ ) between groups of individuals  
569 with high and low phenotype values to avoid the negative impact of spurious  
570 associations [67].

571

## 572 *New models and methods*

573 It is also likely that genomic prediction models, estimation methods, and their  
574 implementations need to be improved to leverage the potential of WGS. This is an  
575 active area of research and multiple novel methodologies have been proposed over the  
576 last years. Some examples are a combination of subsampling and Gibbs sampling

577 [76], and a model that simultaneously fits a GBLUP term for a polygenic effect and a  
578 BayesC term for variants with large effects selected by the model (BayesGC) [24].  
579 Testing alternative models and methods for genomic prediction was out of the scope  
580 of this study. However, together with refinements in the preselection of variants, it  
581 remains an interesting avenue for further optimisation of the analysis pipeline.

582 Some of the most promising methods are designed to incorporate prior  
583 biological information into the models. One of such methods is BayesRC [21], which  
584 extends BayesR by assigning flatter prior distributions to classes of variants that are  
585 more likely to be causal [17,20]. Similarly, GFBLUP [77] could be used to  
586 incorporate prior biological information from either QTL databases or GWAS as  
587 genomic features [19,34,65]. The model MBMG [26], which fits two genomic  
588 relationship matrices according to prior biological information, has also been  
589 proposed for multi-breed scenarios to improve genomic prediction in small  
590 populations. Haplotype-based models have been shown to provide greater prediction  
591 accuracy with WGS than variant-based models in pigs [78] and cattle [79]. However,  
592 the uptake of such models has been limited so far due to additional complexity, for  
593 example, to define haplotype blocks.

594

### **Suitability of whole-genome sequence data for genomic prediction**

595 The small improvements in genomic prediction accuracy that we achieved  
596 with WGS reflect the limited dimensionality of genomic information [61]. The WGS  
597 variants only produce small increases in prediction accuracy compared to marker  
598 arrays because the effective population size of intensely selected livestock populations  
599 is typically small and marker arrays already capture a large proportion of their  
600 independent chromosome segments. Thus, the use of WGS in current

601 implementations of genomic prediction should be carefully evaluated against the cost  
602 of generating the WGS, especially given the large size of the datasets that are  
603 required. Sequencing costs are expected to continue to decrease and therefore large  
604 datasets of WGS will become more affordable in time, while efforts to develop and  
605 optimise scalable and accurate pipelines for WGS-based data generation, storage, and  
606 analysis are on-going (e.g., [80,81]). These advances, together with a finer knowledge  
607 of the genetic architecture of traits empowered by WGS, could allow a case-by-case  
608 refinement of genomic prediction. However, to date, the low robustness of the results  
609 for complex traits discourage the generalised use of WGS for traits that are already  
610 accurately predicted by conventional means.

611

## Conclusion

612 Our results showed that WGS has some potential to improve genomic  
613 prediction accuracy compared to marker arrays in intensely selected pig lines.  
614 However, the prediction accuracy with each set of preselected WGS variants was not  
615 robust across traits and lines and the improvements in prediction accuracy that we  
616 achieved so far with WGS compared to marker arrays were generally small. The most  
617 favourable results for WGS were obtained when the largest training sets were  
618 available and used to preselect variants with statistically significant associations to the  
619 trait for augmenting the established marker array. With this method and training sets  
620 of around 80k individuals, average improvements of genomic prediction accuracy of  
621 0.025 were observed in within-line scenarios. A combination of larger training sets  
622 and improved pipelines could further improve genomic prediction accuracy. The  
623 robustness of the whole strategy for generating WGS at the population level must be  
624 carefully stress-tested and further optimised. However, with the current

625 implementations of genomic prediction, the use of WGS should be carefully evaluated  
626 on a case-by-case basis against the cost of generating the WGS at a large scale.

627

## **Ethics approval and consent to participate**

628 The samples used in this study were derived from the routine breeding activities of  
629 PIC.

## **Consent for publication**

630 Not applicable.

## **Availability of data and material**

631 The software packages AlphaPhase, AlphaImpute, and AlphaPeel are available from  
632 <https://github.com/AlphaGenes>. The software package AlphaSeqOpt is available from  
633 the AlphaGenes website (<http://www.alphagenes.roslin.ed.ac.uk>). The datasets  
634 generated and analysed in this study are derived from the PIC breeding programme  
635 and not publicly available.

## **Competing interests**

636 CYC, BDV, and WOH are employed by Genus PIC. The remaining authors declare  
637 that the research was conducted in the absence of potential conflicts of interest.

## **Funding**

638 The authors acknowledge the financial support from the BBSRC ISPG to The Roslin  
639 Institute (BBS/E/D/30002275), from Genus plc, Innovate UK (grant 102271), and  
640 from grant numbers BB/N004736/1, BB/N015339/1, BB/L020467/1, and  
641 BB/M009254/1. MJ acknowledges financial support from the Swedish Research  
642 Council for Sustainable Development Formas Dnr 2016-01386. For the purpose of

643 open access, the authors have applied a Creative Commons Attribution (CC BY)  
644 licence to any author accepted manuscript version arising from this submission.

## Authors' contributions

645 RRF, GG, and JMH designed the study; CYC assisted in preparing the datasets; RRF,  
646 AW and MJ performed the analyses; RRF wrote the first draft; AW, CYC, BDV,  
647 WHO, GG, and JMH assisted in the interpretation of the results and provided  
648 comments on the manuscript. All authors read and approved the final manuscript.

## Acknowledgements

649 This work has made use of the resources provided by the Edinburgh Compute and  
650 Data Facility (ECDF) (<http://www.ecdf.ed.ac.uk/>).

651

## References

- 652 1. Pasaniuc B, Rohland N, McLaren PJ, Garimella K, Zaitlen N, Li H, et al.  
653 Extremely low-coverage sequencing and imputation increases power for genome-  
654 wide association studies. *Nat Genet.* 2012;44:631–5.
- 655 2. Daetwyler HD, Capitan A, Pausch H, Stothard P, van Binsbergen R, Brondum RF,  
656 et al. Whole-genome sequencing of 234 bulls facilitates mapping of monogenic and  
657 complex traits in cattle. *Nat Genet.* 2014;46:858–65.
- 658 3. Nicod J, Davies RW, Cai N, Hassett C, Goodstadt L, Cosgrove C, et al. Genome-  
659 wide association of multiple complex traits in outbred mice by ultra-low-coverage  
660 sequencing. *Nat Genet.* 2016;48:912–8.
- 661 4. Sanchez M-P, Govignon-Gion A, Croiseau P, Fritz S, Hozé C, Miranda G, et al.  
662 Within-breed and multi-breed GWAS on imputed whole-genome sequence variants  
663 reveal candidate mutations affecting milk protein composition in dairy cattle. *Genet*  
664 *Sel Evol.* 2017;49:68.
- 665 5. Das A, Panitz F, Gregersen VR, Bendixen C, Holm L-E. Deep sequencing of  
666 Danish Holstein dairy cattle for variant detection and insight into potential loss-of-  
667 function variants in protein coding genes. *BMC Genomics.* 2015;16:1043.
- 668 6. Gudbjartsson DF, Helgason H, Gudjonsson SA, Zink F, Oddson A, Gylfason A, et  
669 al. Large-scale whole-genome sequencing of the Icelandic population. *Nat Genet.*  
670 2015;47:435–44.

- 671 7. VanRaden PM. Symposium review: How to implement genomic selection. *J Dairy*  
672 *Sci.* 2020;103:5291–301.
- 673 8. Habier D, Fernando RL, Dekkers JCM. The impact of genetic relationship  
674 information on genome-assisted breeding values. *Genetics.* 2007;177:2389–97.
- 675 9. Clark SA, Hickey JM, Daetwyler HD, Werf JH van der. The importance of  
676 information on relatives for the prediction of genomic breeding values and the  
677 implications for the makeup of reference data sets in livestock breeding schemes.  
678 *Genet Sel Evol.* 2012;44:4.
- 679 10. Meuwissen T, Goddard M. Accurate Prediction of Genetic Values for Complex  
680 Traits by Whole-Genome Resequencing. *Genetics.* 2010;185:623–31.
- 681 11. Druet T, Macleod IM, Hayes BJ. Toward genomic prediction from whole-genome  
682 sequence data: impact of sequencing design on genotype imputation and accuracy of  
683 predictions. *Heredity.* 2014;112:39–47.
- 684 12. MacLeod IM, Hayes BJ, Goddard ME. The Effects of Demography and Long-  
685 Term Selection on the Accuracy of Genomic Prediction with Sequence Data.  
686 *Genetics.* 2014;198:1671–84.
- 687 13. van Binsbergen R, Calus MPL, Bink MCAM, van Eeuwijk FA, Schrooten C,  
688 Veerkamp RF. Genomic prediction using imputed whole-genome sequence data in  
689 Holstein Friesian cattle. *Genet Sel Evol.* 2015;47:71.
- 690 14. Calus MPL, Bouwman AC, Schrooten C, Veerkamp RF. Efficient genomic  
691 prediction based on whole-genome sequence data using split-and-merge Bayesian  
692 variable selection. *Genet Sel Evol.* 2016;48:49.
- 693 15. Veerkamp RF, Bouwman AC, Schrooten C, Calus MPL. Genomic prediction  
694 using preselected DNA variants from a GWAS with whole-genome sequence data in  
695 Holstein–Friesian cattle. *Genet Sel Evol.* 2016;48:95.
- 696 16. Frischknecht M, Meuwissen THE, Bapst B, Seefried FR, Flury C, Garrick D, et al.  
697 Short communication: Genomic prediction using imputed whole-genome sequence  
698 variants in Brown Swiss Cattle. *J Dairy Sci.* 2018;101:1292–6.
- 699 17. Hayes BJ, MacLeod IM, Daetwyler HD, Bowman PJ, Chamberlain AJ, Vander  
700 Jagt CJ, et al. Genomic prediction from whole genome sequence in livestock: the  
701 1000 Bull Genomes Project. *Proc 10th World Congr Genet Appl Livest Prod*  
702 *WCGALP.* Vancouver, BC, Canada; 2014. p. 183.
- 703 18. Heidaritabar M, Calus MPL, Megens H-J, Vereijken A, Groenen MAM,  
704 Bastiaansen JWM. Accuracy of genomic prediction using imputed whole-genome  
705 sequence data in white layers. *J Anim Breed Genet.* 2016;133:167–79.
- 706 19. Song H, Ye S, Jiang Y, Zhang Z, Zhang Q, Ding X. Using imputation-based  
707 whole-genome sequencing data to improve the accuracy of genomic prediction for  
708 combined populations in pigs. *Genet Sel Evol.* 2019;51:58.

- 709 20. Zhang C, Kemp RA, Stothard P, Wang Z, Boddicker N, Krivushin K, et al.  
710 Genomic evaluation of feed efficiency component traits in Duroc pigs using 80K,  
711 650K and whole-genome sequence variants. *Genet Sel Evol.* 2018;50:14.
- 712 21. MacLeod IM, Bowman PJ, Vander Jagt CJ, Haile-Mariam M, Kemper KE,  
713 Chamberlain AJ, et al. Exploiting biological priors and sequence variants enhances  
714 QTL discovery and genomic prediction of complex traits. *BMC Genomics.*  
715 2016;17:144.
- 716 22. Raymond B, Bouwman AC, Schrooten C, Houwing-Duistermaat J, Veerkamp RF.  
717 Utility of whole-genome sequence data for across-breed genomic prediction. *Genet*  
718 *Sel Evol.* 2018;50:27.
- 719 23. Xiang R, MacLeod IM, Daetwyler HD, de Jong G, O'Connor E, Schrooten C, et  
720 al. Genome-wide fine-mapping identifies pleiotropic and functional variants that  
721 predict many traits across global cattle populations. *Nat Commun.* 2021;12:860.
- 722 24. Meuwissen T, van den Berg I, Goddard M. On the use of whole-genome sequence  
723 data for across-breed genomic prediction and fine-scale mapping of QTL. *Genet Sel*  
724 *Evol.* 2021;53:19.
- 725 25. van den Berg I, Bowman PJ, MacLeod IM, Hayes BJ, Wang T, Bolormaa S, et al.  
726 Multi-breed genomic prediction using Bayes R with sequence data and dropping  
727 variants with a small effect. *Genet Sel Evol.* 2017;49:70.
- 728 26. Raymond B, Bouwman AC, Wientjes YCJ, Schrooten C, Houwing-Duistermaat J,  
729 Veerkamp RF. Genomic prediction for numerically small breeds, using models with  
730 pre-selected and differentially weighted markers. *Genet Sel Evol.* 2018;50:49.
- 731 27. Moghaddar N, Brown DJ, Swan AA, Gurman PM, Li L, Werf JH. Genomic  
732 prediction in a numerically small breed population using prioritized genetic markers  
733 from whole-genome sequence data. *J Anim Breed Genet.* 2021;
- 734 28. Brøndum RF, Su G, Janss L, Sahana G, Guldbandsen B, Boichard D, et al.  
735 Quantitative trait loci markers derived from whole genome sequence data increases  
736 the reliability of genomic prediction. *J Dairy Sci.* 2015;98:4107–16.
- 737 29. VanRaden PM, Tooker ME, O'Connell JR, Cole JB, Bickhart DM. Selecting  
738 sequence variants to improve genomic predictions for dairy cattle. *Genet Sel Evol.*  
739 2017;49:32.
- 740 30. Al Kalaldehy M, Gibson J, Duijvesteijn N, Daetwyler HD, MacLeod I, Moghaddar  
741 N, et al. Using imputed whole-genome sequence data to improve the accuracy of  
742 genomic prediction for parasite resistance in Australian sheep. *Genet Sel Evol.*  
743 2019;51:32.
- 744 31. Lopez BIM, An N, Srikanth K, Lee S, Oh J-D, Shin D-H, et al. Genomic  
745 Prediction Based on SNP Functional Annotation Using Imputed Whole-Genome  
746 Sequence Data in Korean Hanwoo Cattle. *Front Genet.* 2021;11:603822.



- 747 32. Hayes BJ, Daetwyler HD. 1000 Bull Genomes Project to Map Simple and  
748 Complex Genetic Traits in Cattle: Applications and Outcomes. *Annu Rev Anim*  
749 *Biosci.* 2019;7:89–102.
- 750 33. Sanchez M-P, Guatteo R, Davergne A, Saout J, Grohs C, Deloche M-C, et al.  
751 Identification of the ABCC4, IER3, and CBFA2T2 candidate genes for resistance to  
752 paratuberculosis from sequence-based GWAS in Holstein and Normande dairy cattle.  
753 *Genet Sel Evol.* 2020;52:14.
- 754 34. Yang R, Xu Z, Wang Q, Zhu D, Bian C, Ren J, et al. Genome-wide association  
755 study and genomic prediction for growth traits in yellow-plumage chicken using  
756 genotyping-by-sequencing. *Genet Sel Evol.* 2021;53:82.
- 757 35. Yan G, Liu X, Xiao S, Xin W, Xu W, Li Y, et al. An imputed whole-genome  
758 sequence-based GWAS approach pinpoints causal mutations for complex traits in a  
759 specific swine population. *Sci China Life Sci.* 2021;
- 760 36. Yang R, Guo X, Zhu D, Tan C, Bian C, Ren J, et al. Accelerated deciphering of  
761 the genetic architecture of agricultural economic traits in pigs using a low-coverage  
762 whole-genome sequencing strategy. *GigaScience.* 2021;10:giab048.
- 763 37. Johnsson M, Jungnickel MK. Evidence for and localization of proposed causative  
764 variants in cattle and pig genomes. *Genet Sel Evol GSE.* 2021;53:67.
- 765 38. Ros-Freixedes R, Whalen A, Chen C-Y, Gorjanc G, Herring WO, Mileham AJ, et  
766 al. Accuracy of whole-genome sequence imputation using hybrid peeling in large  
767 pedigreed livestock populations. *Genet Sel Evol.* 2020;52:17.
- 768 39. Gonen S, Ros-Freixedes R, Battagin M, Gorjanc G, Hickey JM. A method for the  
769 allocation of sequencing resources in genotyped livestock populations. *Genet Sel*  
770 *Evol.* 2017;49:47.
- 771 40. Ros-Freixedes R, Gonen S, Gorjanc G, Hickey JM. A method for allocating low-  
772 coverage sequencing resources by targeting haplotypes rather than individuals. *Genet*  
773 *Sel Evol.* 2017;49:78.
- 774 41. Hickey JM, Kinghorn BP, Tier B, Wilson JF, Dunstan N, van der Werf JH. A  
775 combined long-range phasing and long haplotype imputation method to impute phase  
776 for SNP genotypes. *Genet Sel Evol.* 2011;43:12.
- 777 42. Hickey JM, Kinghorn BP, Tier B, van der Werf JH, Cleveland MA. A phasing  
778 and imputation method for pedigreed populations that results in a single-stage  
779 genomic evaluation. *Genet Sel Evol.* 2012;44:9.
- 780 43. Bolger AM, Lohse M, Usadel B. Trimmomatic: a flexible trimmer for Illumina  
781 sequence data. *Bioinformatics.* 2014;30:2114–20.
- 782 44. Li H. Aligning sequence reads, clone sequences and assembly contigs with BWA-  
783 MEM. arXiv. 2013;1303.3997v1 [q – bio.GN].



- 784 45. DePristo MA, Banks E, Poplin R, Garimella KV, Maguire JR, Hartl C, et al. A  
785 framework for variation discovery and genotyping using next-generation DNA  
786 sequencing data. *Nat Genet.* 2011;43:491–8.
- 787 46. Poplin R, Ruano-Rubio V, DePristo MA, Fennell TJ, Carneiro MO, Van der  
788 Auwera GA, et al. Scaling accurate genetic variant discovery to tens of thousands of  
789 samples. *bioRxiv.* 2018;10.1101/201178.
- 790 47. Ros-Freixedes R, Battagin M, Johnsson M, Gorjanc G, Mileham AJ, Rounsley  
791 SD, et al. Impact of index hopping and bias towards the reference allele on accuracy  
792 of genotype calls from low-coverage sequencing. *Genet Sel Evol.* 2018;50:64.
- 793 48. Li H, Handsaker B, Wysoker A, Fennell T, Ruan J, Homer N, et al. The Sequence  
794 Alignment/Map format and SAMtools. *Bioinformatics.* 2009;25:2078–9.
- 795 49. Danecek P, Auton A, Abecasis G, Albers CA, Banks E, DePristo MA, et al. The  
796 variant call format and VCFtools. *Bioinformatics.* 2011;27:2156–8.
- 797 50. Ros-Freixedes R, Valente B, Chen C-Y, Herring WO, Gorjanc G, Hickey JM, et  
798 al. Rare and population-specific functional variants across pig lines. *Genet Sel Evol.*  
799 2022;54:39.
- 800 51. Whalen A, Ros-Freixedes R, Wilson DL, Gorjanc G, Hickey JM. Hybrid peeling  
801 for fast and accurate calling, phasing, and imputation with sequence data of any  
802 coverage in pedigrees. *Genet Sel Evol.* 2018;50:67.
- 803 52. Ros-Freixedes R, Whalen A, Gorjanc G, Mileham AJ, Hickey JM. Evaluation of  
804 sequencing strategies for whole-genome imputation with hybrid peeling. *Genet Sel*  
805 *Evol.* 2020;52:18.
- 806 53. VanRaden PM, Van Tassell CP, Wiggans GR, Sonstegard TS, Schnabel RD,  
807 Taylor JF, et al. Invited review: reliability of genomic predictions for North American  
808 Holstein bulls. *J Dairy Sci.* 2009;92:16–24.
- 809 54. Lippert C, Listgarten J, Liu Y, Kadie CM, Davidson RI, Heckerman D. FaST  
810 linear mixed models for genome-wide association studies. *Nat Methods.* 2011;8:833–  
811 5.
- 812 55. Widmer C, Lippert C, Weissbrod O, Fusi N, Kadie C, Davidson R, et al. Further  
813 Improvements to Linear Mixed Models for Genome-Wide Association Studies. *Sci*  
814 *Rep.* 2015;4:6874.
- 815 56. Erbe M, Hayes BJ, Matukumalli LK, Goswami S, Bowman PJ, Reich CM, et al.  
816 Improving accuracy of genomic predictions within and between dairy cattle breeds  
817 with imputed high-density single nucleotide polymorphism panels. *J Dairy Sci.*  
818 2012;95:4114–29.
- 819 57. Moser G, Lee SH, Hayes BJ, Goddard ME, Wray NR, Visscher PM. Simultaneous  
820 Discovery, Estimation and Prediction Analysis of Complex Traits Using a Bayesian  
821 Mixture Model. Haley C, editor. *PLOS Genet.* 2015;11:e1004969.

- 822 58. Gebreyesus G, Lund MS, Sahana G, Su G. Reliabilities of Genomic Prediction for  
823 Young Stock Survival Traits Using 54K SNP Chip Augmented With Additional  
824 Single-Nucleotide Polymorphisms Selected From Imputed Whole-Genome  
825 Sequencing Data. *Front Genet.* 2021;12:667300.
- 826 59. Pérez-Enciso M, Rincón JC, Legarra A. Sequence- vs. chip-assisted genomic  
827 selection: accurate biological information is advised. *Genet Sel Evol.* 2015;47:43.
- 828 60. Clark SA, Hickey JM, van der Werf JH. Different models of genetic variation and  
829 their effect on genomic evaluation. *Genet Sel Evol.* 2011;43:18.
- 830 61. Pocrnic I, Lourenco DAL, Masuda Y, Misztal I. Accuracy of genomic BLUP  
831 when considering a genomic relationship matrix based on the number of the largest  
832 eigenvalues: a simulation study. *Genet Sel Evol GSE.* 2019;51:75.
- 833 62. Iheshiulor OOM, Woolliams JA, Yu X, Wellmann R, Meuwissen THE. Within-  
834 and across-breed genomic prediction using whole-genome sequence and single  
835 nucleotide polymorphism panels. *Genet Sel Evol.* 2016;48:15.
- 836 63. Legarra A, Garcia-Baccino CA, Wientjes YCJ, Vitezica ZG. The correlation of  
837 substitution effects across populations and generations in the presence of non-additive  
838 functional gene action. PREPRINT. 2021;
- 839 64. MacLeod IM, Bolormaa S, Schrooten C, Goddard ME, Daetwyler H. Pitfalls of  
840 pre-selecting subsets of sequence variants for genomic prediction. *Proc 22nd Conf*  
841 *Assoc Adv Anim Breed Genet AAABG.* Townsville, Queensland, Australia; 2017. p.  
842 141–4.
- 843 65. Sarup P, Jensen J, Ostersen T, Henryon M, Sørensen P. Increased prediction  
844 accuracy using a genomic feature model including prior information on quantitative  
845 trait locus regions in purebred Danish Duroc pigs. *BMC Genet.* 2016;17:11.
- 846 66. Pausch H, MacLeod IM, Fries R, Emmerling R, Bowman PJ, Daetwyler HD, et al.  
847 Evaluation of the accuracy of imputed sequence variant genotypes and their utility for  
848 causal variant detection in cattle. *Genet Sel Evol.* 2017;49:24.
- 849 67. Ling AS, Hay EH, Aggrey SE, Rekaya R. Dissection of the impact of prioritized  
850 QTL-linked and -unlinked SNP markers on the accuracy of genomic selection. *BMC*  
851 *Genomic Data.* 2021;22:26.
- 852 68. van den Berg I, Boichard D, Guldbrandtsen B, Lund MS. Using Sequence  
853 Variants in Linkage Disequilibrium with Causative Mutations to Improve Across-  
854 Breed Prediction in Dairy Cattle: A Simulation Study. *G3 GenesGenomesGenetics.*  
855 2016;6:2553–61.
- 856 69. Fragomeni BO, Lourenco DAL, Masuda Y, Legarra A, Misztal I. Incorporation of  
857 causative quantitative trait nucleotides in single-step GBLUP. *Genet Sel Evol.*  
858 2017;49:59.
- 859 70. Bolormaa S, Swan AA, Stothard P, Khansefid M, Moghaddar N, Duijvesteijn N,  
860 et al. A conditional multi-trait sequence GWAS discovers pleiotropic candidate genes

861 and variants for sheep wool, skin wrinkle and breech cover traits. *Genet Sel Evol.*  
862 2021;53:58.

863 71. van den Berg I, Xiang R, Jenko J, Pausch H, Boussaha M, Schrooten C, et al.  
864 Meta-analysis for milk fat and protein percentage using imputed sequence variant  
865 genotypes in 94,321 cattle from eight cattle breeds. *Genet Sel Evol.* 2020;52:37.

866 72. van den Berg I, Boichard D, Lund MS. Sequence variants selected from a multi-  
867 breed GWAS can improve the reliability of genomic predictions in dairy cattle. *Genet*  
868 *Sel Evol.* 2016;48:83.

869 73. Yoshida GM, Yáñez JM. Multi-trait GWAS using imputed high-density  
870 genotypes from whole-genome sequencing identifies genes associated with body traits  
871 in Nile tilapia. *BMC Genomics.* 2021;22:57.

872 74. Yang J, Fritsche LG, Zhou X, Abecasis G. A Scalable Bayesian Method for  
873 Integrating Functional Information in Genome-wide Association Studies. *Am J Hum*  
874 *Genet.* 2017;101:404–16.

875 75. Li J, Mukiibi R, Wang Y, Plastow GS, Li C. Identification of candidate genes and  
876 enriched biological functions for feed efficiency traits by integrating plasma  
877 metabolites and imputed whole genome sequence variants in beef cattle. *BMC*  
878 *Genomics.* 2021;22:823.

879 76. Xavier A, Xu S, Muir W, Rainey KM. Genomic prediction using subsampling.  
880 *BMC Bioinformatics.* 2017;18:191.

881 77. Edwards SM, Sørensen IF, Sarup P, Mackay TFC, Sørensen P. Genomic  
882 Prediction for Quantitative Traits Is Improved by Mapping Variants to Gene Ontology  
883 Categories in *Drosophila melanogaster*. *Genetics.* 2016;203:1871–83.

884 78. Bian C, Prakapenka D, Tan C, Yang R, Zhu D, Guo X, et al. Haplotype genomic  
885 prediction of phenotypic values based on chromosome distance and gene boundaries  
886 using low-coverage sequencing in Duroc pigs. *Genet Sel Evol.* 2021;53:78.

887 79. Li H, Zhu B, Xu L, Wang Z, Xu L, Zhou P, et al. Genomic Prediction Using LD-  
888 Based Haplotypes Inferred From High-Density Chip and Imputed Sequence Variants  
889 in Chinese Simmental Beef Cattle. *Front Genet.* 2021;12:665382.

890 80. Eggertsson HP, Jonsson H, Kristmundsdottir S, Hjartarson E, Kehr B, Masson G,  
891 et al. GraphTyper enables population-scale genotyping using pangenome graphs. *Nat*  
892 *Genet.* 2017;49:1654–60.

893 81. Talenti A, Powell J, Hemmink JD, Cook E a. J, Wragg D, Jayaraman S, et al. A  
894 cattle graph genome incorporating global breed diversity. *Nat Commun.* 2022;13:910.

895

896

## Figures

897

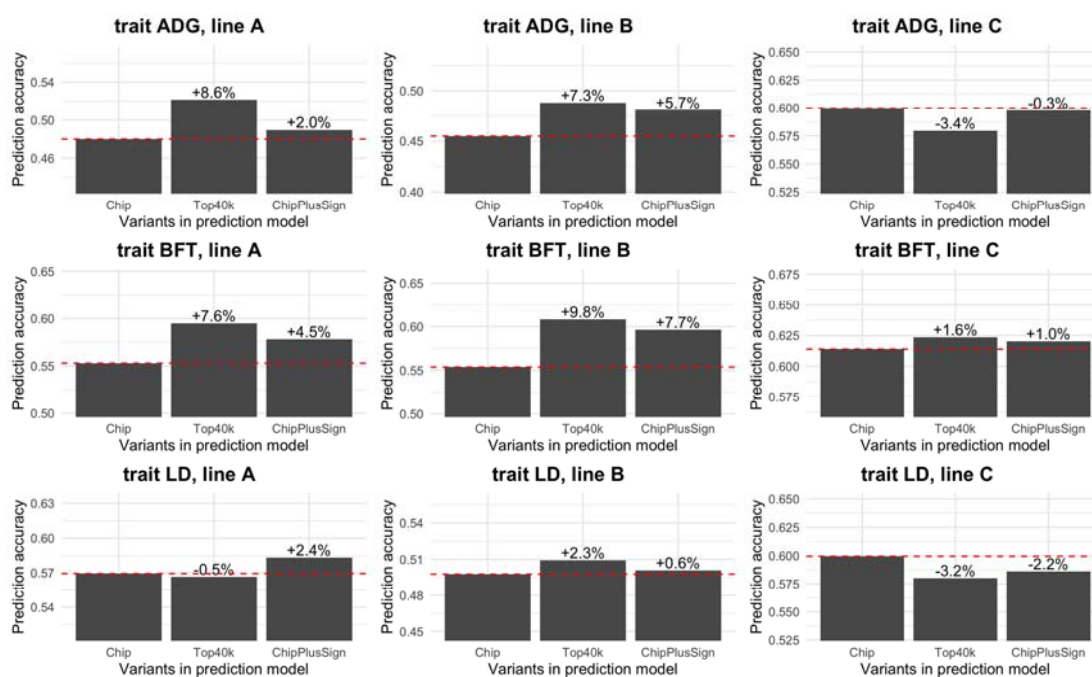

898

899 **Figure 1.** Genomic prediction accuracy for each set of variants for traits ADG, BFT,

900 and LD in the three largest lines. Dashed line at value of marker array (Chip) as a

901 reference. Values indicate relative difference to marker array (Chip).

902

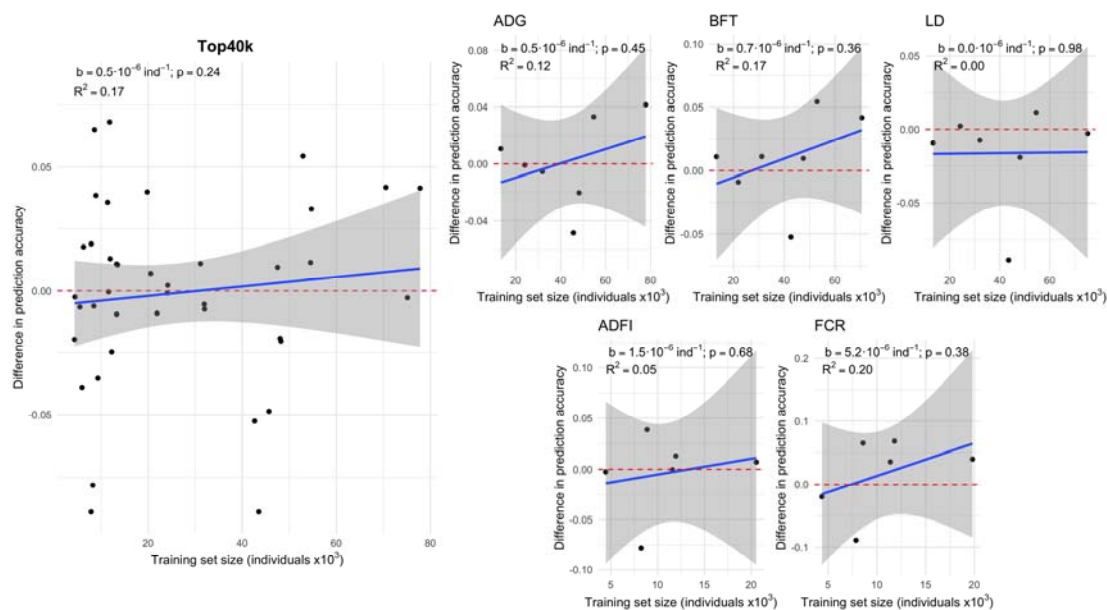

903

904 **Figure 2.** Genomic prediction accuracy with the Top40k variants for the complex  
905 traits. The difference between the Top40k and marker array is shown for all traits and  
906 lines (left) or by trait (right). Red dashed line at ‘no difference’. Regression  
907 coefficient (b) and p-value of training set size is provided, as well as the coefficient of  
908 determination ( $R^2$ ) of the model. The linear model for the joint analyses included the  
909 trait effect.

910

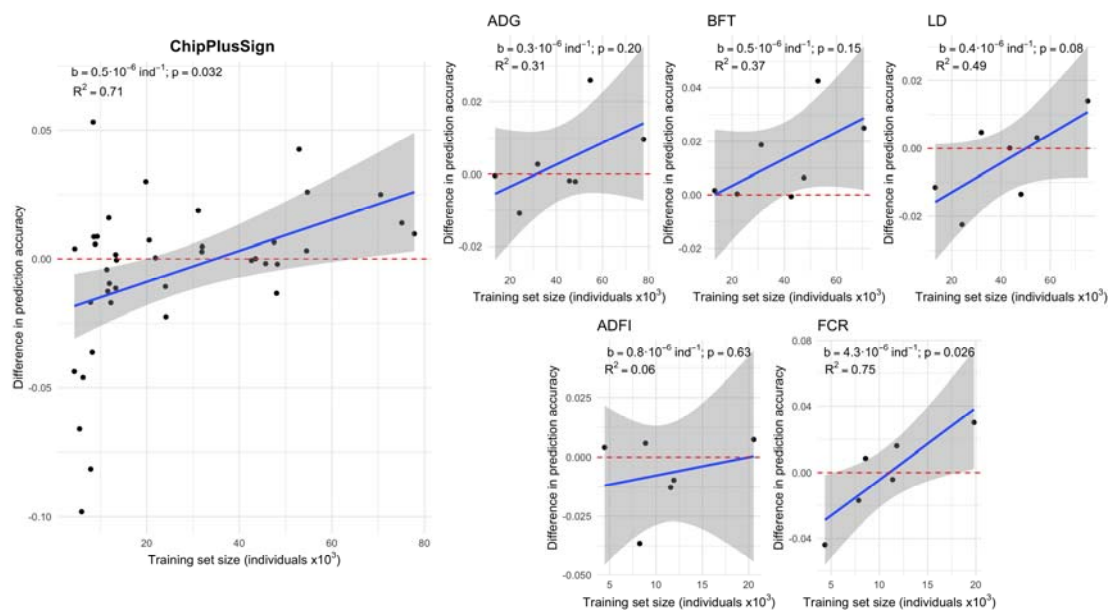

911

912 **Figure 3.** Genomic prediction accuracy with the ChipPlusSign variants for the  
913 complex traits. The difference between the ChipPlusSign and marker array is shown  
914 for all traits and lines (left) or by trait (right). Red dashed line at ‘no difference’.  
915 Regression coefficient (b) and p-value of training set size is provided, as well as the  
916 coefficient of determination ( $R^2$ ) of the model. The linear model for the joint analyses  
917 included the trait effect.

918



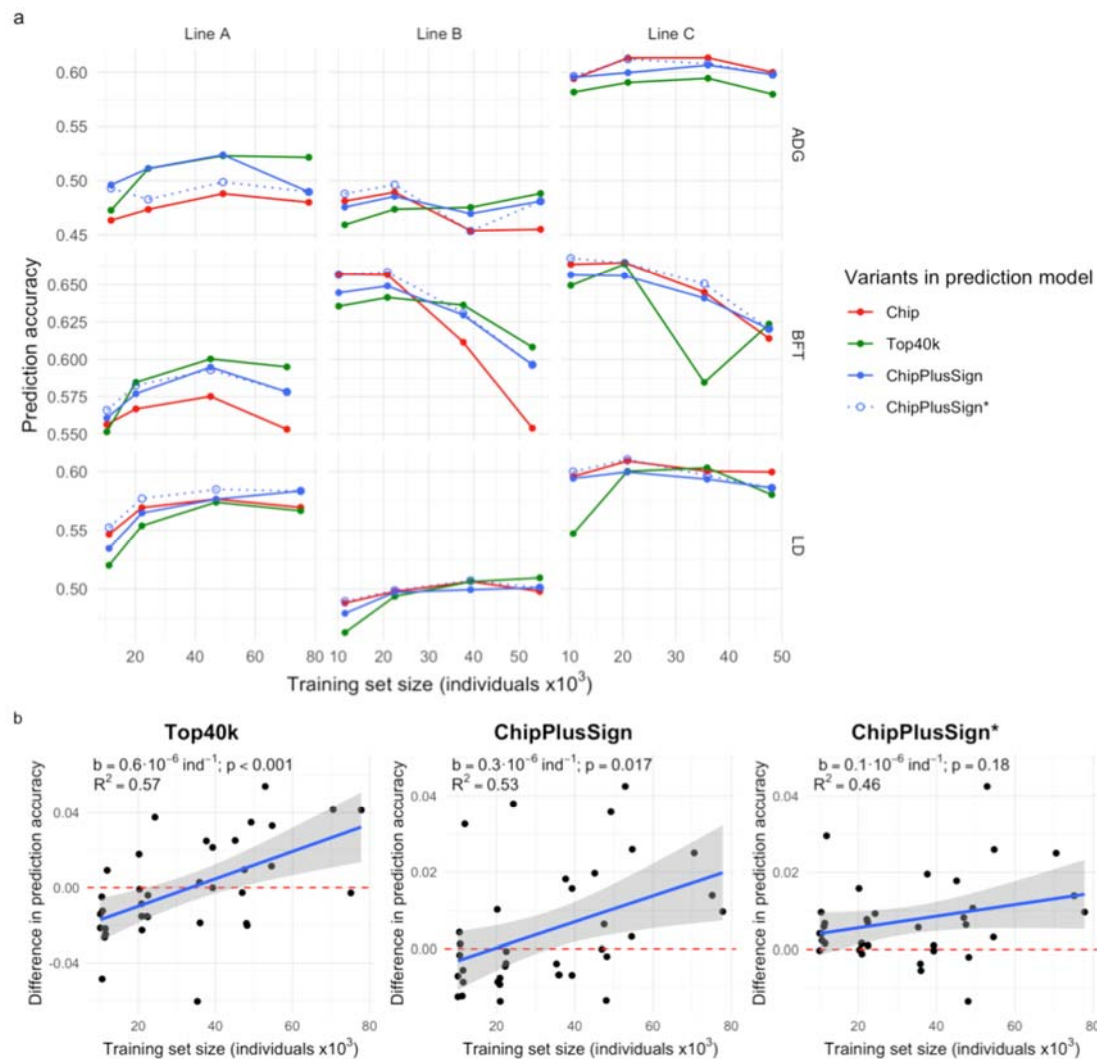

919

920 **Figure 4.** Effect of training set size on the genomic prediction accuracy for each set of  
 921 variants for traits ADG, BFT, and LD in the three largest lines. **(a)** Genomic  
 922 prediction accuracy with the marker array (Chip) or with preselected WGS data  
 923 (Top40k, ChipPlusSign, and ChipPlusSign\*). In ChipPlusSign\* variants are  
 924 preselected based on associations tested using the largest training set available. **(b)**  
 925 The difference between the ChipPlusSign and Chip is shown for all traits and lines.  
 926 Red dashed line at ‘no difference’. Regression coefficient (b) and p-value of training  
 927 set size is provided, as well as the coefficient of determination ( $R^2$ ) of the model. The  
 928 linear model for the joint analyses included the trait and line effects.

929

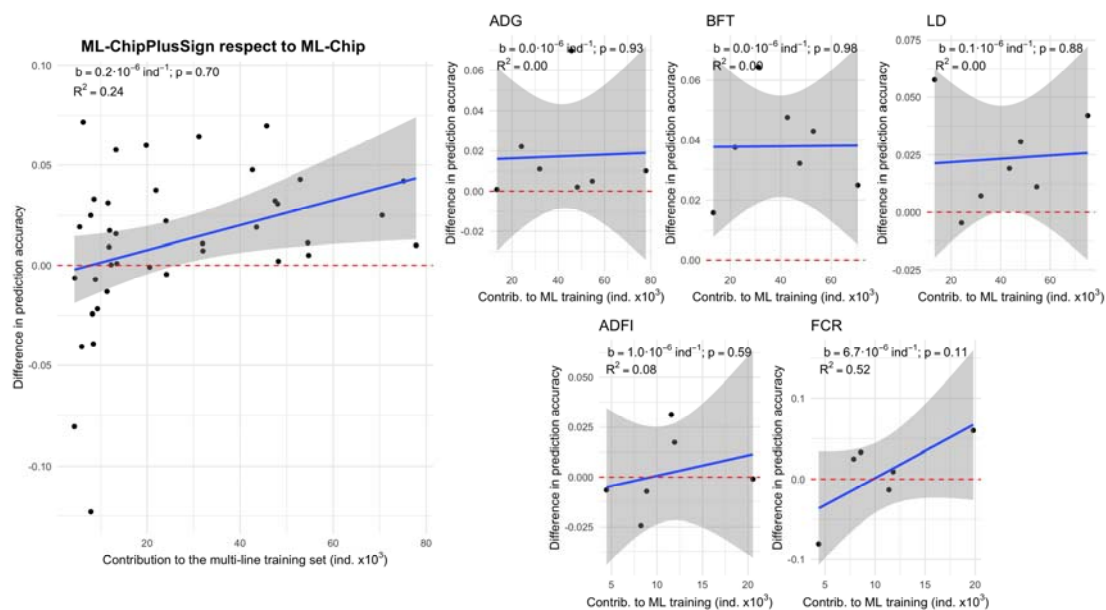

930

931 **Figure 5.** Genomic prediction accuracy with the ML-ChipPlusSign variants for the  
 932 complex traits. The difference between ML-ChipPlusSign and marker array (ML-  
 933 Chip) is shown for all traits and lines (left) or by trait (right). Red dashed line at ‘no  
 934 difference’. Regression coefficient (b) and p-value of training set size is provided, as  
 935 well as the coefficient of determination ( $R^2$ ) of the model. The linear model for the  
 936 joint analyses included the trait effect.

937



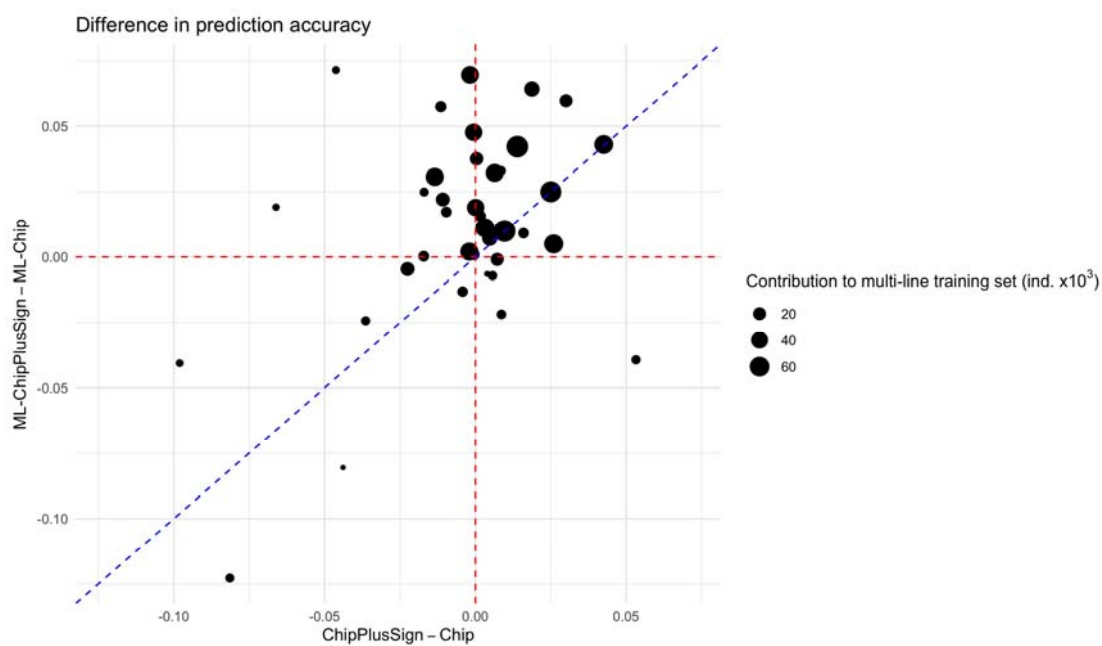

938

939 **Figure 6.** Comparison of the difference in genomic prediction accuracy in the multi-  
940 line scenarios (between ML-ChipPlusSign and ML-Chip) and in the within-line  
941 scenarios (between ChipPlusSign and Chip) for all traits and lines. Red dashed line at  
942 'no difference'. Blue dashed line is the bisector.

943

## Tables

944 **Table 1.** Number of sequenced pigs and pigs with imputed data.

| Line | Individuals sequenced | Individuals sequenced by coverage |     |    |        | Individuals used in the analyses |        |        |         |
|------|-----------------------|-----------------------------------|-----|----|--------|----------------------------------|--------|--------|---------|
|      |                       | 1x                                | 2x  | 5x | 15–30x | Pedigree                         | LD     | HD     | Imputed |
| A    | 1,856                 | 1,044                             | 649 | 73 | 90     | 122,753                          | 39,485 | 66,763 | 104,661 |
| B    | 1,366                 | 685                               | 545 | 44 | 92     | 88,964                           | 39,110 | 38,763 | 76,230  |
| C    | 1,491                 | 628                               | 728 | 54 | 81     | 84,420                           | 35,343 | 34,358 | 66,608  |
| D    | 731                   | 362                               | 311 | 16 | 42     | 79,981                           | 16,650 | 54,297 | 60,474  |
| E    | 760                   | 394                               | 274 | 27 | 65     | 50,797                           | 22,768 | 20,685 | 41,573  |
| F    | 381                   | 193                               | 137 | 16 | 35     | 35,309                           | 11,747 | 17,758 | 29,330  |
| G    | 445                   | 217                               | 176 | 15 | 37     | 21,129                           | 11,472 | 6,661  | 17,224  |

945 *Pedigree* number of individuals included in the pedigree used for imputation, *LD*

946 number of individuals genotyped with the low-density marker array, *HD* number of

947 individuals genotyped with high-density marker arrays, *Imputed* number of

948 individuals with imputed genotypes that remain after filtering out individuals with

949 low predicted imputation accuracy.

950

951 **Table 2.** Number of phenotype records per trait and line.

| <b>Trait</b> | <b>Set</b> | <b>A</b> | <b>B</b> | <b>C</b> | <b>D</b> | <b>E</b> | <b>F</b> | <b>G</b> |
|--------------|------------|----------|----------|----------|----------|----------|----------|----------|
| ADG          | Training   | 77,811   | 54,709   | 48,219   | 45,693   | 31,918   | 24,046   | 13,479   |
|              | Test       | 9,435    | 8,387    | 6,977    | 4,789    | 3,019    | 1,808    | 1,572    |
| BFT          | Training   | 70,529   | 52,910   | 47,512   | 42,636   | 31,127   | 21,892   | 13,300   |
|              | Test       | 8,560    | 7,957    | 6,747    | 4,301    | 2,936    | 1,602    | 1,568    |
| LD           | Training   | 75,117   | 54,537   | 48,054   | 43,517   | 31,987   | 24,154   | 13,303   |
|              | Test       | 9,021    | 8,415    | 6,995    | 4,411    | 3,024    | 1,807    | 1,570    |
| ADFI         | Training   | 20,535   | 8,866    | 8,235    | 11,573   | 11,930   | 4,000    | 4,457    |
|              | Test       | 1,358    | 638      | 802      | 641      | 478      | 97*      | 364      |
| FCR          | Training   | 19,805   | 8,572    | 7,857    | 11,378   | 11,804   | 3,900    | 4,364    |
|              | Test       | 1,328    | 624      | 775      | 624      | 477      | 97*      | 360      |
| TNB          | Training   | 12,250   | 9,315    | 8,438    | 7,700    | 5,834    | -        | 2,865    |
|              | Test       | 254      | 428      | 400      | 23*      | 125*     | -        | 98*      |
| LWW          | Training   | -        | 7,884    | 6,251    | -        | -        | -        | 2,505    |
|              | Test       | -        | 246      | 220      | -        | -        | -        | 47*      |
| RET          | Training   | -        | 5,928    | 5,496    | -        | -        | -        | 1,481    |
|              | Test       | -        | 332      | 282      | -        | -        | -        | 70*      |

952 *ADG* average daily gain, *BFT* backfat thickness, *LD* loin depth, *ADFI* average daily

953 feed intake, *FCR* feed conversion ratio, *TNB* total number of piglets born, *LWW* litter

954 weight at weaning, *RET* return to oestrus 7 days after weaning.

955 \*Included in multi-line scenarios, but excluded in within-line scenarios because of the

956 limited size of the testing set.

957

958 **Table 3.** Number of significant variants from the whole-genome sequence data that  
959 were added to the marker array in ChipPlusSign.

| <b>Trait</b> | <b>A</b> | <b>B</b> | <b>C</b> | <b>D</b> | <b>E</b> | <b>F</b> | <b>G</b> | <b>Multi-line</b> |
|--------------|----------|----------|----------|----------|----------|----------|----------|-------------------|
| ADG          | 646      | 581      | 424      | 498      | 279      | 219      | 143      | 4731              |
| BFT          | 1083     | 758      | 664      | 518      | 1030     | 218      | 237      | 6149              |
| LD           | 633      | 579      | 458      | 518      | 222      | 215      | 43       | 7247              |
| ADFI         | 145      | 224      | 169      | 23       | 183      | -        | 119      | 767               |
| FCR          | 198      | 224      | 162      | 95       | 56       | -        | 134      | 1369              |
| TNB          | 71       | 117      | 161      | -        | -        | -        | -        | 248               |
| LWW          | -        | 32       | 73       | -        | -        | -        | -        | 480               |
| RET          | -        | 184      | 31       | -        | -        | -        | -        | 60                |

960 *ADG* average daily gain, *BFT* backfat thickness, *LD* loin depth, *ADFI* average daily  
961 feed intake, *FCR* feed conversion ratio, *TNB* total number of piglets born, *LWW* litter  
962 weight at weaning, *RET* return to oestrus 7 days after weaning.

963
